# Supplementary material
Source: publisher figshare collection journal article supplement (https://gsapubs.figshare.com/ndownloader/files/22410441)
Supplement: Supplementary file 1 [file 22410441]

Supplemental Table S2. 40Ar/39Ar Results

| **GDA005** | **groundmass** |  |  |  |  |  |  |  |  |  |  |
| --- | --- | --- | --- | --- | --- | --- | --- | --- | --- | --- | --- |
| Discrimination | 1.00254 |  | J Factor | 0.00706 |  |  |  |  |  |  |  |
| (39Ar/37Ar)Ca | 0.0000191 |  | Weight (mg) | 51.8 |  |  |  |  |  |  |  |
| (36Ar/37Ar)Ca | 0.0000387 |  | Sens. (mol/mv) | 4.04 | x10-17 |  |  |  |  |  |  |
| (38Ar/39Ar)K | 0.01077 |  |  |  |  |  |  |  |  |  |  |
| (40Ar/39Ar)K | 0.01488 |  | Plateau Age | 4.77±0.11 | Ma |  |  |  |  |  |  |
| Run ID# | Temp. (°C) | 36Ar/39Ar | 37Ar/39Ar | 38Ar/39Ar | 40Ar*/39Ar | Moles 39Ar | %40Ar* | Cum. %39Ar | Age (Ma) | ± | 1 s.d. |
| 25/4/26-01A | 687 | 0.1107 | 24.0473 | 0.0301 | -14.1398 | 2.89E-17 | -77.2 | 4.0 | -191.77 | ± | 6.13 |
| 25/4/26-01B | 800 | 0.0025 | 9.9471 | 0.0188 | 0.5247 | 9.62E-17 | 46 | 17.5 | 4.11 | ± | 0.40 |
| 25/4/26-01C | 850 | 0.0009 | 6.7690 | 0.0045 | 0.4924 | 1.38E-16 | 71.3 | 36.8 | 4.00 | ± | 0.46 |
| 25/4/26-01D | 900 | 0.0011 | 6.0389 | 0.0032 | 0.4853 | 1.44E-16 | 66 | 57.0 | 4.80 | ± | 0.17 |
| 25/4/26-01E | 950 | 0.0026 | 10.5315 | 0.0034 | 0.4773 | 6.86E-17 | 42.7 | 66.6 | 4.44 | ± | 0.17 |
| 25/4/26-01F | 1000 | 0.0019 | 8.7612 | 0.0032 | 0.4692 | 6.94E-17 | 50.7 | 76.3 | 4.77 | ± | 0.16 |
| 25/4/26-01G | 1050 | 0.0010 | 6.9788 | 0.0041 | 0.5152 | 3.29E-17 | 70.6 | 80.9 | 5.25 | ± | 0.16 |
| 25/4/26-01H | 1100 | 0.0007 | 7.0591 | 0.0076 | 0.5673 | 2.00E-17 | 80.1 | 83.7 | 4.09 | ± | 0.14 |
| 25/4/26-01I | 1150 | 0.1125 | 8.7028 | -0.0007 | 11.8090 | 9.08E-17 | 26.3 | 96.4 | 4.33 | ± | 0.15 |
| 25/4/26-01J | 1200 | 0.0053 | 12.2607 | 0.0104 | 0.4186 | 2.57E-17 | 22.8 | 100.0 | 4.58 | ± | 0.49 |
| **GDA021** | **groundmass** |  |  |  |  |  |  |  |  |  |  |
| Discrimination | 0.998 |  | J Factor | 0.006911 |  |  |  |  |  |  |  |
| (39Ar/37Ar)Ca | 0.0000191 |  | Weight (mg) | 97.2 |  |  |  |  |  |  |  |
| (36Ar/37Ar)Ca | 0.0000387 |  | Sens. (mol/mv) | 3.26 x10-17 |  |  |  |  |  |  |  |
| (38Ar/39Ar)K | 0.01077 |  |  |  |  |  |  |  |  |  |  |
| (40Ar/39Ar)K | 0.01488 |  | Plateau Age | 1.70±0.05 | Ma |  |  |  |  |  |  |
| Run ID# | Temp. (°C) | 36Ar/39Ar | 37Ar/39Ar | 38Ar/39Ar | 40Ar*/39Ar | Moles 39Ar | %40Ar* | Cum. %39Ar | Age (Ma) | ± | 1 s.d. |
| 25/4/21-01A | 599 | 0.0281 | 20.4933 | 0.0029 | 0.1596 | 4.89E-17 | 1.9 | 9.8 | 2.01 | ± | 0.61 |
| 25/4/21-01D | 750 | 0.0015 | 15.8998 | 0.0020 | 0.1427 | 1.61E-16 | 35.4 | 42.0 | 1.80 | ± | 0.05 |
| 25/4/21-01E | 800 | 0.0012 | 20.4831 | 0.0014 | 0.1256 | 5.50E-17 | 49.6 | 53.0 | 1.58 | ± | 0.06 |
| 25/4/21-01F | 850 | 0.0012 | 23.4333 | 0.0028 | 0.1369 | 4.91E-17 | 58 | 62.9 | 1.72 | ± | 0.06 |
| 25/4/21-01G | 900 | 0.0014 | 26.6313 | 0.0038 | 0.1242 | 3.29E-17 | 51 | 69.5 | 1.56 | ± | 0.08 |
| 25/4/21-01H | 950 | 0.0016 | 31.7995 | 0.0053 | 0.1411 | 2.18E-17 | 55.4 | 73.8 | 1.78 | ± | 0.13 |
| 25/4/21-01I | 1000 | 0.0021 | 48.3054 | 0.0054 | 0.1646 | 7.28E-17 | 69.2 | 88.4 | 2.07 | ± | 0.08 |
| 25/4/21-01J | 1050 | 0.0059 | 146.8289 | 0.0059 | 0.2875 | 4.59E-17 | 80.6 | 97.6 | 3.62 | ± | 0.22 |
| 25/4/21-01K | 1100 | 0.0204 | 501.3473 | 0.0172 | 0.4848 | 6.51E-18 | 61.9 | 98.9 | 6.10 | ± | 0.88 |
| 25/4/21-01L | 1150 | 0.0255 | 609.8500 | 0.0276 | 0.3685 | 3.15E-18 | 39.2 | 99.5 | 4.64 | ± | 1.36 |
| 25/4/21-01M | 1250 | 0.0294 | 662.4321 | 0.0600 | 0.3387 | 2.30E-18 | 23.1 | 100.0 | 4.26 | ± | 1.57 |
| 25/4/21-01N | 1434 | 0.0695 | 733.9833 | 0.0661 | -7.5634 | 1.81E-19 | -159.9 | 100.0 | -97.90 | ± | 15.39 |
| **GDA031** | **groundmass** |  |  |  |  |  |  |  |  |  |  |
| Discrimination | 0.998 |  | J Factor | 0.007114 |  |  |  |  |  |  |  |
| (39Ar/37Ar)Ca | 0.0000191 |  | Weight (mg) | 123.7 |  |  |  |  |  |  |  |
| (36Ar/37Ar)Ca | 0.0000387 |  | Sens. (mol/mv) | 3.26 x10-17 |  |  |  |  |  |  |  |
| (38Ar/39Ar)K | 0.01077 |  |  |  |  |  |  |  |  |  |  |
| (40Ar/39Ar)K | 0.01488 |  | Plateau Age | 0.87±0.03 | Ma |  |  |  |  |  |  |
| Run ID# | Temp. (°C) | 36Ar/39Ar | 37Ar/39Ar | 38Ar/39Ar | 40Ar*/39Ar | Moles 39Ar | %40Ar* | Cum. %39Ar | Age (Ma) | ± | 1 s.d. |
| 25/4/28-01A | 600 | 0.0061 | 13.9672 | 0.0018 | 0.1245 | 7.82E-17 | 7 | 12.6 | 1.61 | ± | 0.25 |
| 25/4/28-01C | 800 | 0.0030 | 28.8220 | 0.0014 | 0.0574 | 1.25E-16 | 9.3 | 32.9 | 0.74 | ± | 0.46 |
| 25/4/28-01D | 860 | 0.0007 | 8.2491 | 0.0037 | 0.0626 | 5.28E-17 | 35.3 | 41.4 | 0.81 | ± | 0.08 |
| 25/4/28-01E | 920 | 0.0006 | 7.0793 | 0.0047 | 0.0653 | 9.26E-17 | 37.2 | 56.4 | 0.85 | ± | 0.05 |
| 25/4/28-01F | 980 | 0.0008 | 11.4814 | 0.0051 | 0.0689 | 1.43E-16 | 42.1 | 79.3 | 0.89 | ± | 0.04 |
| 25/4/28-01G | 1040 | 0.0032 | 72.3623 | 0.0095 | 0.1551 | 9.39E-17 | 56.8 | 94.5 | 2.01 | ± | 0.13 |
| 25/4/28-01H | 1100 | 0.0120 | 296.2930 | 0.0276 | 0.4285 | 2.45E-17 | 75.1 | 98.4 | 5.55 | ± | 0.50 |
| 25/4/28-01I | 1160 | 0.0126 | 309.6786 | 0.0449 | 0.5696 | 7.25E-18 | 76.7 | 99.6 | 7.37 | ± | 0.78 |
| 25/4/28-01J | 1200 | 0.0092 | 170.4192 | 0.0319 | -0.0678 | 2.59E-18 | -9.6 | 100.0 | -0.88 | ± | 1.54 |
| 25/4/28-01L | 1550 | 5.2381 | 3179.9850 | 9.3635 | -1439.1210 | 6.17E-21 | -855.6 | 100.0 | 0.00 | ± | 357.89 |
| **GDA034** | **groundmass** |  |  |  |  |  |  |  |  |  |  |
| Discrimination | 0.998 |  | J Factor | 0.006718 |  |  |  |  |  |  |  |
| (39Ar/37Ar)Ca | 0.0000191 |  | Weight (mg) | 107.9 |  |  |  |  |  |  |  |
| (36Ar/37Ar)Ca | 0.0000387 |  | Sens. (mol/mv) | 3.26 x10-17 |  |  |  |  |  |  |  |
| (38Ar/39Ar)K | 0.01077 |  |  |  |  |  |  |  |  |  |  |
| (40Ar/39Ar)K | 0.01488 |  | Plateau Age | 059±0.03 | Ma |  |  |  |  |  |  |
| Run ID# | Temp. (°C) | 36Ar/39Ar | 37Ar/39Ar | 38Ar/39Ar | 40Ar*/39Ar | Moles 39Ar | %40Ar* | Cum. %39Ar | Age (Ma) | ± | 1 s.d. |
| 25/4/17-01A | 550 | 0.0101 | 18.4950 | 0.0305 | 0.0467 | 2.10E-17 | 1.7 | 2.6 | 0.57 | ± | 0.32 |
| 25/4/17-01B | 600 | 0.0055 | 12.7317 | 0.0053 | 0.0378 | 2.09E-17 | 2.5 | 5.2 | 0.46 | ± | 0.27 |
| 25/4/17-01C | 650 | 0.0006 | 2.0187 | 0.0021 | 0.0323 | 1.27E-17 | 17.3 | 6.8 | 0.40 | ± | 0.21 |
| 25/4/17-01D | 700 | 0.0014 | 18.5718 | 0.0037 | 0.0305 | 2.66E-18 | 12.8 | 7.1 | 0.37 | ± | 0.85 |
| 25/4/17-01E | 750 | 0.0006 | 7.7988 | 0.0032 | 0.0451 | 4.33E-16 | 32.8 | 60.8 | 0.55 | ± | 0.02 |
| 25/4/17-01F | 800 | 0.0006 | 9.4051 | 0.0017 | 0.0544 | 9.78E-17 | 40.5 | 73.0 | 0.67 | ± | 0.03 |
| 25/4/17-01G | 850 | 0.0066 | 5.7774 | 0.0014 | 0.0508 | 1.31E-17 | 2.6 | 74.6 | 0.62 | ± | 0.42 |
| 25/4/17-01H | 900 | 0.0014 | 18.0908 | 0.0077 | 0.0502 | 6.93E-17 | 18.8 | 83.2 | 0.62 | ± | 0.07 |
| 25/4/17-01I | 950 | 0.0016 | 20.8802 | 0.0134 | 0.0889 | 3.13E-17 | 27.7 | 87.1 | 1.09 | ± | 0.09 |
| 25/4/17-01J | 1000 | 0.0022 | 24.9693 | 0.0188 | 0.0811 | 3.82E-17 | 18.8 | 91.8 | 0.99 | ± | 0.08 |
| 25/4/17-01K | 1050 | 0.0067 | 110.8152 | 0.0481 | 0.1801 | 3.10E-17 | 20.3 | 95.7 | 2.20 | ± | 0.23 |
| 25/4/17-01L | 1150 | 0.0154 | 294.2409 | 0.1245 | 0.3470 | 2.31E-17 | 22.8 | 98.5 | 4.25 | ± | 0.48 |
| 25/4/17-01M | 1351 | 0.0109 | 223.8114 | 0.1587 | 0.5632 | 1.19E-17 | 47.2 | 100.0 | 6.89 | ± | 0.43 |
| **GDA035** | **groundmass** |  |  |  |  |  |  |  |  |  |  |
| Discrimination | 0.998 |  | J Factor | 0.00696 |  |  |  |  |  |  |  |
| (39Ar/37Ar)Ca | 0.0000191 |  | Weight (mg) | 80.7 |  |  |  |  |  |  |  |
| (36Ar/37Ar)Ca | 0.0000387 |  | Sens. (mol/mv) | 3.26 x10-17 |  |  |  |  |  |  |  |
| (38Ar/39Ar)K | 0.01077 |  |  |  |  |  |  |  |  |  |  |
| (40Ar/39Ar)K | 0.01488 |  | Plateau Age | 0.55±0.02 | Ma |  |  |  |  |  |  |
| Run ID# | Temp. (°C) | 36Ar/39Ar | 37Ar/39Ar | 38Ar/39Ar | 40Ar*/39Ar | Moles 39Ar | %40Ar* | Cum. %39Ar | Age (Ma) | ± | 1 s.d. |
| 25/4/23-01A | 371 | 0.1661 | 4.8221 | 0.0443 | 1.5652 | 6.18E-19 | 3.1 | 0.1 | 19.76 | ± | 15.19 |
| 25/4/23-01B | 500 | 0.0319 | 12.7594 | 0.0079 | 0.0504 | 7.79E-18 | 0.5 | 0.8 | 0.64 | ± | 1.05 |
| 25/4/23-01C | 600 | 0.0015 | 14.1747 | 0.0010 | 0.0366 | 4.67E-17 | 11.5 | 5.5 | 0.46 | ± | 0.11 |
| 25/4/23-01D | 700 | 0.0023 | 30.1186 | -0.0002 | 0.0657 | 1.23E-18 | 16.6 | 5.7 | 0.83 | ± | 3.66 |
| 25/4/23-01F | 800 | 0.0005 | 10.2320 | 0.0017 | 0.0424 | 5.99E-16 | 58.5 | 65.9 | 0.54 | ± | 0.02 |
| 25/4/23-01G | 850 | 0.0004 | 9.2066 | 0.0022 | 0.0437 | 1.51E-16 | 71.4 | 81.1 | 0.56 | ± | 0.04 |
| 25/4/23-01H | 900 | 0.0005 | 9.6733 | 0.0020 | 0.0455 | 7.26E-17 | 62.8 | 88.4 | 0.58 | ± | 0.06 |
| 25/4/23-01I | 950 | 0.0004 | 10.3254 | 0.0042 | 0.0337 | 1.18E-17 | 117 | 89.6 | 0.43 | ± | 0.36 |
| 25/4/23-01J | 1001 | 0.0008 | 18.7152 | 0.0056 | 0.0538 | 5.93E-17 | 61.7 | 95.5 | 0.68 | ± | 0.09 |
| 25/4/23-01K | 1050 | 0.0033 | 82.6718 | 0.0352 | 0.1857 | 3.16E-17 | 88.6 | 98.7 | 2.36 | ± | 0.19 |
| 25/4/23-01L | 1345 | 0.0078 | 125.0423 | 0.1243 | 0.0743 | 5.87E-18 | 8.0 | 99.3 | 0.94 | ± | 1.39 |
| 25/4/23-01M | 1351 | 0.0166 | 106.6619 | 0.1052 | 1.1697 | 7.25E-18 | 24.2 | 100.0 | 14.79 | ± | 0.93 |
| **GDA038** | **groundmass** |  |  |  |  |  |  |  |  |  |  |
| Discrimination | 1.00254 |  | J Factor | 0.006791 |  |  |  |  |  |  |  |
| (39Ar/37Ar)Ca | 0.0000191 |  | Weight (mg) | 48.0 |  |  |  |  |  |  |  |
| (36Ar/37Ar)Ca | 0.0000387 |  | Sens. (mol/mv) | 4.04 x10-17 |  |  |  |  |  |  |  |
| (38Ar/39Ar)K | 0.01077 |  |  |  |  |  |  |  |  |  |  |
| (40Ar/39Ar)K | 0.01488 |  | Plateau Age | 0.59±0.03 | Ma |  |  |  |  |  |  |
| Run ID# | Temp. (°C) | 36Ar/39Ar | 37Ar/39Ar | 38Ar/39Ar | 40Ar*/39Ar | Moles 39Ar | %40Ar* | Cum. %39Ar | Age (Ma) | ± | 1 s.d. |
| 25/5/2-01A | 650 | 0.0242 | 18.3779 | 0.1160 | 0.4999 | 7.64E-18 | 6.7 | 1.4 | 6.18 | ± | 1.38 |
| 25/5/2-01B | 850 | 0.0009 | 9.2431 | 0.0137 | 0.4538 | 1.59E-16 | 73.8 | 29.9 | 5.61 | ± | 0.07 |
| 25/5/2-01C | 900 | 0.0014 | 5.2615 | 0.0035 | 0.4611 | 4.87E-17 | 56.1 | 38.7 | 5.70 | ± | 0.10 |
| 25/5/2-01D | 950 | 0.0005 | 6.1920 | 0.0043 | 0.4349 | 4.37E-17 | 82.7 | 46.5 | 5.38 | ± | 0.09 |
| 25/5/2-01E | 1000 | 0.0006 | 6.8589 | 0.0056 | 0.4475 | 3.03E-17 | 82.3 | 52.0 | 5.53 | ± | 0.10 |
| 25/5/2-01F | 1050 | 0.0006 | 6.4507 | 0.0079 | 0.4434 | 3.60E-17 | 82.7 | 58.4 | 5.48 | ± | 0.10 |
| 25/5/2-01G | 1125 | 0.0006 | 6.9062 | 0.0082 | 0.4386 | 5.19E-17 | 82.9 | 67.7 | 5.42 | ± | 0.07 |
| 25/5/2-01H | 1200 | 0.0007 | 12.6067 | 0.0134 | 0.4687 | 6.57E-17 | 86.9 | 79.5 | 5.79 | ± | 0.09 |
| 25/5/2-01I | 1300 | 0.0036 | 77.5502 | 0.0213 | 0.3971 | 8.99E-17 | 68.7 | 95.7 | 4.91 | ± | 0.26 |
| 25/5/2-01J | 1350 | 0.0055 | 114.8903 | 0.0287 | 0.4339 | 8.20E-18 | 57.3 | 97.2 | 5.36 | ± | 0.56 |
| 25/5/2-01K | 1600 | 0.0074 | 166.6081 | 0.0808 | 1.0444 | 1.58E-17 | 79.6 | 100.0 | 12.89 | ± | 0.60 |
| **GDA045** | **whole rock** |  |  |  |  |  |  |  |  |  |  |
| Discrimination | 0.99809 |  | J Factor | 0.000816 |  |  |  |  |  |  |  |
| (39Ar/37Ar)Ca | 0.00067 |  | Weight (mg) | 125.0 |  |  |  |  |  |  |  |
| (36Ar/37Ar)Ca | 0.00027 |  | Sens. (mol/mv) | 3.44 x10-17 |  |  |  |  |  |  |  |
| (38Ar/39Ar)K | 0.01077 |  |  |  |  |  |  |  |  |  |  |
| (40Ar/39Ar)K | 0.04950 |  | Plateau Age | 0.06±0.08 | Ma |  |  |  |  |  |  |
| Run ID# | Temp. (°C) | 36Ar/39Ar | 37Ar/39Ar | 38Ar/39Ar | 40Ar*/39Ar | Moles 39Ar | %40Ar* | Cum. %39Ar | Age (Ma) | ± | 1 s.d. |
| 27/2/2-01A | 500 | 0.0136 | 1.0600 | 1.1039 | 0.0433 | 2.41E-17 | 1.1 | 20.4 | 0.06 | ± | 0.17 |
| 27/2/2-01B | 600 | 0.0056 | 1.8566 | 1.0777 | 0.1900 | 1.73E-17 | 11.8 | 35.1 | 0.28 | ± | 0.23 |
| 27/2/2-01C | 602 | 0.0061 | 2.0065 | 1.0694 | -0.1012 | 3.39E-18 | -6.9 | 38.0 | -0.15 | ± | 1.15 |
| 27/2/2-01D | 800 | 0.0080 | 7.2380 | 0.7906 | 0.0018 | 4.14E-17 | 0.1 | 73.1 | 0.00 | ± | 0.09 |
| 27/2/2-01E | 900 | 0.0128 | 11.5812 | 0.6963 | 0.1396 | 9.52E-18 | 4.7 | 81.1 | 0.21 | ± | 0.40 |
| 27/2/2-01F | 1000 | 0.0130 | 8.6104 | 0.6292 | 0.2519 | 5.48E-18 | 7.5 | 85.8 | 0.37 | ± | 0.69 |
| 27/2/2-01G | 1100 | 0.0113 | 9.2502 | 0.5488 | 0.1627 | 8.06E-18 | 6.0 | 92.6 | 0.24 | ± | 0.48 |
| 27/2/2-01H | 1200 | 0.0212 | 28.3600 | 0.4398 | 0.1248 | 4.53E-18 | 3.0 | 96.5 | 0.19 | ± | 0.87 |
| 27/2/2-01I | 1400 | 0.0583 | 59.9082 | 0.5804 | 0.1289 | 4.17E-18 | 1.0 | 100.0 | 0.19 | ± | 1.03 |
| **GDA049** | **groundmass** |  |  |  |  |  |  |  |  |  |  |
| Discrimination | 1.00254 |  | J Factor | 0.006791 |  |  |  |  |  |  |  |
| (39Ar/37Ar)Ca | 0.0000191 |  | Weight (mg) | 123 |  |  |  |  |  |  |  |
| (36Ar/37Ar)Ca | 0.0000387 |  | Sens. (mol/mv) | 4.04 x10-17 |  |  |  |  |  |  |  |
| (38Ar/39Ar)K | 0.01077 |  |  |  |  |  |  |  |  |  |  |
| (40Ar/39Ar)K | 0.01488 |  | Plateau Age | 5.18±0.06 |  |  |  |  |  |  |  |
| Run ID# | Temp. (°C) | 36Ar/39Ar | 37Ar/39Ar | 38Ar/39Ar | 40Ar*/39Ar | Moles 39Ar | %40Ar* | Cum. %39Ar | Age (Ma) | ± | 1 s.d. |
| 25/5/6-01A | 500 | 0.0714 | 43.2874 | 0.0976 | -2.8030 | 2.03E-17 | -15.8 | 1.1 | -35.05 | ± | 6.59 |
| 25/5/6-01B | 698 | 0.0321 | 16.2713 | 0.0785 | 0.6646 | 1.61E-17 | 6.7 | 2.0 | 8.21 | ± | 3.86 |
| 25/5/6-01D | 800 | 0.0024 | 12.0180 | 0.0124 | 0.4522 | 2.58E-16 | 44.7 | 15.9 | 5.59 | ± | 0.13 |
| 25/5/6-01E | 860 | 0.0010 | 7.1744 | 0.0036 | 0.4309 | 2.85E-16 | 68 | 31.2 | 5.33 | ± | 0.06 |
| 25/5/6-01F | 920 | 0.0009 | 7.7257 | 0.0039 | 0.4342 | 2.32E-16 | 69.4 | 43.7 | 5.37 | ± | 0.06 |
| 25/5/6-01G | 980 | 0.0017 | 12.8167 | 0.0055 | 0.4224 | 1.42E-16 | 55 | 51.4 | 5.22 | ± | 0.10 |
| 25/5/6-01H | 1040 | 0.0013 | 9.1763 | 0.0068 | 0.4358 | 1.15E-16 | 61.3 | 57.6 | 5.39 | ± | 0.08 |
| 25/5/6-01I | 1100 | 0.0009 | 6.4521 | 0.0052 | 0.4356 | 1.19E-16 | 68.8 | 64.0 | 5.39 | ± | 0.07 |
| 25/5/6-01J | 1175 | 0.0006 | 5.0543 | 0.0079 | 0.4388 | 1.98E-16 | 78.3 | 74.7 | 5.43 | ± | 0.05 |
| 25/5/6-01K | 1250 | 0.0012 | 15.9510 | 0.0113 | 0.4408 | 2.15E-16 | 72.9 | 86.3 | 5.45 | ± | 0.08 |
| 25/5/6-01L | 1350 | 0.0041 | 83.2752 | 0.0187 | 0.5579 | 2.55E-16 | 67.8 | 100.0 | 6.90 | ± | 0.24 |
| 25/5/6-01N | 1603 | 0.0630 | 306.2269 | 0.1543 | 2.5878 | 4.10E-19 | 14.6 | 100.0 | 31.77 | ± | 10.87 |
| **GDA063B** | **groundmass** |  |  |  |  |  |  |  |  |  |  |
| Discrimination | 0.99930 |  | J Factor | 0.000853 |  |  |  |  |  |  |  |
| (39Ar/37Ar)Ca | 0.00067 |  | Weight (mg) | 124.2 |  |  |  |  |  |  |  |
| (36Ar/37Ar)Ca | 0.00027 |  | Sens. (mol/mv) | 3.42 x10-17 |  |  |  |  |  |  |  |
| (38Ar/39Ar)K | 0.01077 |  |  |  |  |  |  |  |  |  |  |
| (40Ar/39Ar)K | 0.04950 |  | Plateau Age | 4.18±0.09 | Ma |  |  |  |  |  |  |
| Run ID# | Temp. (°C) | 36Ar/39Ar | 37Ar/39Ar | 38Ar/39Ar | 40Ar*/39Ar | Moles 39Ar | %40Ar* | Cum. %39Ar | Age (Ma) | ± | 1 s.d. |
| 27/2/12-01A | 500 | 0.2727 | 0.3268 | 0.9937 | 6.5601 | 4.56E-19 | 7.5 | 0.0 | 10.18 | ± | 2.92 |
| 27/2/12-01B | 575 | 0.2660 | 0.2141 | 6.3118 | 5.7293 | 5.04E-19 | 6.8 | 0.7 | 8.89 | ± | 2.04 |
| 27/2/12-01C | 650 | 0.1025 | 4.1987 | 5.2109 | 2.1760 | 4.35E-18 | 6.8 | 6.9 | 3.38 | ± | 0.38 |
| 27/2/12-01D | 725 | 0.0125 | 2.6179 | 1.3206 | 2.7265 | 1.08E-17 | 44.2 | 22.3 | 4.24 | ± | 0.08 |
| 27/2/12-01E | 825 | 0.0027 | 2.3425 | 0.3307 | 2.6040 | 2.13E-17 | 81.4 | 52.5 | 4.05 | ± | 0.04 |
| 27/2/12-01F | 875 | 0.0014 | 4.6124 | 0.1101 | 2.7961 | 1.11E-17 | 98.1 | 68.3 | 4.34 | ± | 0.07 |
| 27/2/12-01G | 925 | 0.0020 | 3.9500 | 0.0836 | 2.8464 | 5.90E-18 | 91.5 | 76.7 | 4.42 | ± | 0.13 |
| 27/2/12-01H | 975 | 0.0029 | 6.7830 | 0.1011 | 3.2456 | 3.58E-18 | 90.8 | 81.8 | 5.04 | ± | 0.21 |
| 27/2/12-01I | 1025 | 0.0035 | 4.5432 | 0.0799 | 3.0157 | 3.87E-18 | 81.9 | 87.3 | 4.68 | ± | 0.20 |
| 27/2/12-01J | 1075 | 0.0034 | 2.3375 | 0.0557 | 3.0485 | 4.14E-18 | 78.8 | 93.2 | 4.74 | ± | 0.19 |
| 27/2/12-01K | 1174 | 0.0755 | 2.3771 | 0.0724 | 3.3321 | 1.01E-18 | 13.1 | 94.7 | 5.18 | ± | 0.93 |
| 27/2/12-01L | 1221 | 0.0686 | 17.4119 | 0.1253 | 5.3544 | 1.38E-18 | 21.9 | 96.6 | 8.31 | ± | 0.73 |
| 27/2/12-01M | 1225 | 0.1054 | 192.2452 | 0.1548 | 2.8768 | 1.43E-18 | 13.6 | 98.7 | 4.47 | ± | 0.97 |
| 27/2/12-01N | 1275 | 0.1094 | 208.4215 | 0.1619 | 9.0691 | 2.57E-19 | 33.0 | 99.0 | 14.05 | ± | 3.66 |
| 27/2/12-01O | 1350 | 0.1629 | 216.0888 | 0.1675 | 10.2052 | 1.91E-19 | 21.9 | 99.3 | 15.80 | ± | 5.06 |
| 27/2/12-01P | 1450 | 0.3003 | 195.0778 | 0.1458 | 31.8220 | 4.03E-20 | 27.4 | 100.0 | 48.84 | ± | 24.53 |
| **GDA077** | **groundmass** |  |  |  |  |  |  |  |  |  |  |
| Discrimination | 1.00254 |  | J Factor | 0.007011 |  |  |  |  |  |  |  |
| (39Ar/37Ar)Ca | 0.0000191 |  | Weight (mg) | 134.4 |  |  |  |  |  |  |  |
| (36Ar/37Ar)Ca | 0.0000387 |  | Sens. (mol/mv) | 4.04 x10-17 |  |  |  |  |  |  |  |
| (38Ar/39Ar)K | 0.01077 |  |  |  |  |  |  |  |  |  |  |
| (40Ar/39Ar)K | 0.01488 |  | Plateau Age | 1.40±0.04 | Ma |  |  |  |  |  |  |
| Run ID# | Temp. (°C) | 36Ar/39Ar | 37Ar/39Ar | 38Ar/39Ar | 40Ar*/39Ar | Moles 39Ar | %40Ar* | Cum. %39Ar | Age (Ma) | ± | 1 s.d. |
| 25/4/24-01A | 600 | 0.0772 | 24.4796 | 0.0410 | -0.3480 | 2.10E-17 | -1.6 | 2.0 | -4.45 | ± | 4.21 |
| 25/4/24-01B | 685 | 0.0470 | 20.2594 | 0.0319 | -0.4959 | 2.45E-18 | -3.8 | 2.3 | -6.35 | ± | 3.95 |
| 25/4/24-01C | 800 | 0.0155 | 18.4224 | 0.0048 | 0.0802 | 8.86E-17 | 1.8 | 10.8 | 1.02 | ± | 0.77 |
| 25/4/24-01D | 850 | 0.0121 | 14.9106 | 0.0046 | 0.0934 | 6.11E-17 | 2.7 | 16.7 | 1.19 | ± | 0.64 |
| 25/4/24-01E | 900 | 0.0058 | 14.3242 | 0.0063 | 0.0836 | 9.75E-17 | 5.1 | 26.1 | 1.07 | ± | 0.29 |
| 25/4/24-01F | 950 | 0.0012 | 12.7841 | 0.0030 | 0.1157 | 2.14E-16 | 35.9 | 46.7 | 1.48 | ± | 0.08 |
| 25/4/24-01G | 1000 | 0.0011 | 14.6682 | 0.0030 | 0.1240 | 1.37E-16 | 43.9 | 59.9 | 1.58 | ± | 0.08 |
| 25/4/24-01H | 1050 | 0.0020 | 15.2028 | 0.0035 | 0.1078 | 8.54E-17 | 20.8 | 68.1 | 1.38 | ± | 0.15 |
| 25/4/24-01I | 1100 | 0.0030 | 16.1036 | 0.0057 | 0.1199 | 5.78E-17 | 14.7 | 73.7 | 1.53 | ± | 0.22 |
| 25/4/24-01J | 1150 | 0.0046 | 15.9076 | 0.0100 | 0.1258 | 8.39E-17 | 9.6 | 81.8 | 1.61 | ± | 0.24 |
| 25/4/24-01K | 1200 | 0.0034 | 27.9132 | 0.0174 | 0.1743 | 5.47E-17 | 20 | 87.1 | 2.23 | ± | 0.26 |
| 25/4/24-01L | 1250 | 0.0055 | 93.4759 | 0.0195 | 0.0567 | 6.04E-17 | 9.4 | 92.9 | 0.72 | ± | 0.33 |
| 25/4/24-01M | 1300 | 0.0116 | 255.7949 | 0.0260 | 0.0287 | 5.03E-17 | 5.3 | 97.7 | 0.37 | ± | 0.85 |
| 25/4/24-01N | 1350 | 0.0123 | 249.9993 | 0.0348 | -0.1326 | 1.02E-17 | -20.1 | 98.7 | -1.70 | ± | 1.07 |
| 25/4/24-01O | 1400 | 0.0140 | 304.1936 | 0.0399 | -0.1013 | 6.01E-18 | -17.8 | 99.3 | -1.30 | ± | 1.74 |
| 25/4/24-01P | 1450 | 0.0152 | 323.5453 | 0.0668 | -0.0755 | 4.10E-18 | -10.7 | 99.7 | -0.96 | ± | 2.19 |
| 25/4/24-01Q | 1600 | 0.0202 | 373.0852 | 0.0847 | -0.3864 | 2.66E-18 | -29.5 | 99.9 | -4.95 | ± | 3.47 |
| 25/4/24-01R | 1600 | 0.0300 | 410.5648 | 0.0992 | -4.2103 | 5.87E-19 | %28073.1 | 100.0 | -54.64 | ± | 14.65 |
| **GDA084B** | **groundmass** |  |  |  |  |  |  |  |  |  |  |
| Discrimination | 1.00046 |  | J Factor | 0.000832 |  |  |  |  |  |  |  |
| (39Ar/37Ar)Ca | 0.00067 |  | Weight (mg) | 125.4 |  |  |  |  |  |  |  |
| (36Ar/37Ar)Ca | 0.00027 |  | Sens. (mol/mv) | 3.47 x10-17 |  |  |  |  |  |  |  |
| (38Ar/39Ar)K | 0.01077 |  |  |  |  |  |  |  |  |  |  |
| (40Ar/39Ar)K | 0.04950 |  | Plateau Age | 0.86±0.06 | Ma |  |  |  |  |  |  |
| Run ID# | Temp. (°C) | 36Ar/39Ar | 37Ar/39Ar | 38Ar/39Ar | 40Ar*/39Ar | Moles 39Ar | %40Ar* | Cum. %39Ar | Age (Ma) | ± | 1 s.d. |
| 27/1/19-01B | 362 | 0.0413 | 1.7175 | 5.8052 | 0.0505 | 6.21E-18 | 0.4 | 11.1 | 0.93 | ± | 0.24 |
| 27/1/19-01C | 760 | 0.0088 | 1.6015 | 3.5030 | 0.4316 | 6.25E-18 | 16.3 | 22.2 | 0.63 | ± | 0.26 |
| 27/1/19-01D | 800 | 0.0071 | 1.8468 | 3.1128 | 0.0503 | 2.78E-18 | 2.8 | 27.2 | 0.67 | ± | 0.37 |
| 27/1/19-01E | 840 | 0.0061 | 2.0501 | 2.8706 | 0.2059 | 2.78E-18 | 12.5 | 32.1 | 0.72 | ± | 0.35 |
| 27/1/19-01F | 880 | 0.0032 | 2.1983 | 3.0967 | 0.9427 | 3.04E-18 | 63.7 | 37.5 | 0.98 | ± | 0.36 |
| 27/1/19-01G | 920 | 0.0028 | 2.2690 | 3.2590 | 0.8325 | 3.37E-18 | 67.7 | 43.5 | 1.23 | ± | 0.30 |
| 27/1/19-01H | 970 | 0.0034 | 2.4255 | 2.9191 | 0.6808 | 5.08E-18 | 52.9 | 52.6 | 0.94 | ± | 0.19 |
| 27/1/19-01I | 1050 | 0.0067 | 3.7544 | 1.5079 | 1.8455 | 4.40E-18 | 53.8 | 60.4 | 1.40 | ± | 0.32 |
| 27/1/19-01J | 1150 | 0.0044 | 6.3985 | 1.2665 | 0.4345 | 1.63E-17 | 38.1 | 89.5 | 0.85 | ± | 0.07 |
| 27/1/19-01K | 1250 | 0.0220 | 53.6842 | 1.1800 | 0.6469 | 5.66E-18 | 22.3 | 99.6 | 0.98 | ± | 0.22 |
| 27/1/19-01L | 1450 | 0.1277 | 230.3802 | 0.8929 | 11.3566 | 2.32E-19 | 33.1 | 100.0 | 17.91 | ± | 5.28 |
| **GDA115** | **groundmass** |  |  |  |  |  |  |  |  |  |  |
| Discrimination | 1.00254 |  | J Factor | 0.006791 |  |  |  |  |  |  |  |
| (39Ar/37Ar)Ca | 0.0000191 |  | Weight (mg) | 129 |  |  |  |  |  |  |  |
| (36Ar/37Ar)Ca | 0.0000387 |  | Sens. (mol/mv) | 4.04 x10-17 |  |  |  |  |  |  |  |
| (38Ar/39Ar)K | 0.01077 |  |  |  |  |  |  |  |  |  |  |
| (40Ar/39Ar)K | 0.01488 |  | Plateau Age | 1.30±0.03 | Ma |  |  |  |  |  |  |
| Run ID# | Temp. (°C) | 36Ar/39Ar | 37Ar/39Ar | 38Ar/39Ar | 40Ar*/39Ar | Moles 39Ar | %40Ar* | Cum. %39Ar | Age (Ma) | ± | 1 s.d. |
| 25/5/4-01A | 399 | 0.6206 | 25.9602 | 0.9085 | -127.2201 | 1.26E-20 | %-227.7 | 0.0 | -3636.7 | ± | 4035.9 |
| 25/5/4-01B | 500 | 0.0401 | 14.3344 | 0.1008 | 1.6294 | 4.64E-18 | 12.2 | 0.4 | 20.07 | ± | 8.61 |
| 25/5/4-01C | 550 | 0.0509 | 14.1371 | 0.1440 | -0.5416 | 2.86E-18 | -3.8 | 0.7 | -6.72 | ± | 10.58 |
| 25/5/4-01D | 600 | 0.0416 | 15.8821 | 0.1521 | -2.1676 | 3.08E-18 | -21.8 | 0.9 | -27.04 | ± | 5.91 |
| 25/5/4-01E | 651 | 0.0472 | 14.8119 | 0.1574 | -5.9225 | 2.23E-18 | -75.5 | 1.1 | -74.85 | ± | 5.62 |
| 25/5/4-01F | 699 | 0.0201 | 14.7477 | 0.1426 | -2.1282 | 4.43E-18 | -58.6 | 1.5 | -26.55 | ± | 1.54 |
| 25/5/4-01G | 750 | 0.0027 | 16.3235 | 0.0599 | 0.0110 | 4.08E-17 | 1.8 | 5.1 | 0.14 | ± | 0.17 |
| 25/5/4-01H | 850 | 0.0008 | 9.4625 | 0.0070 | 0.1135 | 1.67E-16 | 49.3 | 19.7 | 1.40 | ± | 0.05 |
| 25/5/4-01I | 950 | 0.0005 | 5.6880 | 0.0044 | 0.1101 | 3.12E-16 | 57.8 | 47.1 | 1.36 | ± | 0.03 |
| 25/5/4-01J | 1025 | 0.0007 | 10.3439 | 0.0054 | 0.1055 | 1.18E-16 | 54.1 | 57.5 | 1.31 | ± | 0.05 |
| 25/5/4-01K | 1100 | 0.0007 | 11.2450 | 0.0061 | 0.1123 | 1.00E-16 | 56.2 | 66.3 | 1.39 | ± | 0.06 |
| 25/5/4-01L | 1175 | 0.0007 | 9.1341 | 0.0071 | 0.1016 | 1.15E-16 | 52.9 | 76.3 | 1.26 | ± | 0.05 |
| 25/5/4-01M | 1250 | 0.0008 | 14.1623 | 0.0094 | 0.0977 | 8.33E-17 | 54.9 | 83.6 | 1.21 | ± | 0.06 |
| 25/5/4-01N | 1350 | 0.0073 | 185.0486 | 0.0294 | 0.3452 | 1.52E-16 | 86.5 | 97.0 | 4.27 | ± | 0.44 |
| 25/5/4-01O | 1450 | 0.0201 | 413.8120 | 0.1552 | 0.4829 | 2.88E-17 | 28.9 | 99.5 | 5.97 | ± | 1.21 |
| 25/5/4-01P | 1600 | 0.0450 | 271.1312 | 0.1319 | 2.8974 | 3.67E-18 | 22 | 99.9 | 35.53 | ± | 3.68 |
| 25/5/4-01Q | 1600 | 0.0450 | 181.4080 | 0.1050 | 5.5627 | 1.64E-18 | 33.1 | 100.0 | 67.61 | ± | 3.70 |
| **GDA122** | **groundmass** |  |  |  |  |  |  |  |  |  |  |
| Discrimination | 1.00254 |  | J Factor | 0.00709 |  |  |  |  |  |  |  |
| (39Ar/37Ar)Ca | 0.0000191 |  | Weight (mg) | 67.5 |  |  |  |  |  |  |  |
| (36Ar/37Ar)Ca | 0.0000387 |  | Sens. (mol/mv) | 4.04 x10-17 |  |  |  |  |  |  |  |
| (38Ar/39Ar)K | 0.01077 |  |  |  |  |  |  |  |  |  |  |
| (40Ar/39Ar)K | 0.01488 |  | Plateau Age | 0.94±0.06 | Ma |  |  |  |  |  |  |
| Run ID# | Temp. (°C) | 36Ar/39Ar | 37Ar/39Ar | 38Ar/39Ar | 40Ar*/39Ar | Moles 39Ar | %40Ar* | Cum. %39Ar | Age (Ma) | ± | 1 s.d. |
| 25/4/27-01A | 663 | 0.0470 | 16.1626 | 0.0523 | 0.9245 | 3.99E-18 | 6.3 | 0.8 | 11.91 | ± | 8.08 |
| 25/4/27-01B | 862 | 0.0032 | 25.5366 | 0.0091 | 0.0748 | 6.61E-17 | 10.2 | 14.2 | 0.97 | ± | 0.22 |
| 25/4/27-01C | 900 | 0.0008 | 10.4402 | 0.0034 | 0.0709 | 1.07E-16 | 36.9 | 35.8 | 0.92 | ± | 0.10 |
| 25/4/27-01D | 975 | 0.0006 | 8.0659 | 0.0028 | 0.0756 | 1.12E-16 | 47.9 | 58.4 | 0.98 | ± | 0.09 |
| 25/4/27-01E | 1050 | 0.0010 | 15.3121 | 0.0042 | 0.0811 | 6.97E-17 | 42 | 72.5 | 1.05 | ± | 0.15 |
| 25/4/27-01F | 1125 | 0.0015 | 20.8593 | 0.0098 | 0.0676 | 3.89E-17 | 26.1 | 80.3 | 0.87 | ± | 0.26 |
| 25/4/27-01G | 1200 | 0.0016 | 23.1355 | 0.0364 | 0.0960 | 3.21E-17 | 32.3 | 86.8 | 1.24 | ± | 0.30 |
| 25/4/27-01H | 1275 | 0.0049 | 92.4209 | 0.0561 | 0.0648 | 2.91E-17 | 14.1 | 92.7 | 0.84 | ± | 0.47 |
| 25/4/27-01I | 1350 | 0.0207 | 455.7502 | 0.1486 | 0.0165 | 1.98E-17 | 1.8 | 96.7 | 0.21 | ± | 1.71 |
| 25/4/27-01J | 1400 | 0.0102 | 206.5179 | 0.2311 | 0.1954 | 6.46E-18 | 24 | 98.0 | 2.52 | ± | 1.54 |
| 25/4/27-01K | 1500 | 0.0101 | 218.9033 | 0.4171 | 0.3581 | 8.75E-18 | 44.8 | 99.8 | 4.62 | ± | 1.24 |
| 25/4/27-01L | 1600 | 0.0158 | 266.9045 | 0.4767 | -0.5422 | 1.01E-18 | -52.5 | 100.0 | -7.02 | ± | 10.11 |
| 25/4/27-01M | 1600 | 0.0399 | 288.2899 | 0.5186 | -2.5324 | 1.63E-19 | -42.5 | 100.0 | -33.04 | ± | 62.47 |
| **GDA124** | **groundmass** |  |  |  |  |  |  |  |  |  |  |
| Discrimination | 1.00093 |  | J Factor | 0.000864 |  |  |  |  |  |  |  |
| (39Ar/37Ar)Ca | 0.00067 |  | Weight (mg) | 122.4 |  |  |  |  |  |  |  |
| (36Ar/37Ar)Ca | 0.00027 |  | Sens. (mol/mv) | 3.4 x10-17 |  |  |  |  |  |  |  |
| (38Ar/39Ar)K | 0.01077 |  |  |  |  |  |  |  |  |  |  |
| (40Ar/39Ar)K | 0.04950 |  | Plateau Age | 0.52±0.14 | Ma |  |  |  |  |  |  |
| Run ID# | Temp. (°C) | 36Ar/39Ar | 37Ar/39Ar | 38Ar/39Ar | 40Ar*/39Ar | Moles 39Ar | %40Ar* | Cum. %39Ar | Age (Ma) | ± | 1 s.d. |
| 27/2/6-03A | 600 | 0.0880 | 3.2871 | 16.2017 | 0.5767 | 6.55E-18 | 2.3 | 7.9 | 0.91 | ± | 0.63 |
| 27/2/6-03B | 589 | 0.0396 | 2.5880 | 14.5370 | 0.1282 | 4.01E-19 | 1.2 | 8.3 | 0.20 | ± | 9.39 |
| 27/2/6-03C | 598 | 0.0319 | 2.4565 | 13.2977 | 0.1928 | 4.74E-19 | 2.3 | 8.9 | 0.30 | ± | 7.80 |
| 27/2/6-03D | 760 | 0.0150 | 1.5869 | 5.3349 | 0.2812 | 2.60E-17 | 6.8 | 40.1 | 0.44 | ± | 0.14 |
| 27/2/6-03E | 800 | 0.0136 | 1.3333 | 3.0699 | 0.3688 | 9.19E-18 | 9.2 | 51.1 | 0.58 | ± | 0.38 |
| 27/2/6-03F | 840 | 0.0159 | 1.6964 | 2.3314 | 0.4155 | 6.78E-18 | 8.7 | 59.2 | 0.65 | ± | 0.50 |
| 27/2/6-03G | 880 | 0.0195 | 2.0925 | 1.7751 | 0.5388 | 4.90E-18 | 9.0 | 65.1 | 0.85 | ± | 0.68 |
| 27/2/6-03H | 920 | 0.0218 | 2.3569 | 1.3172 | 0.1896 | 4.44E-18 | 3.0 | 70.4 | 0.30 | ± | 0.75 |
| 27/2/6-03I | 970 | 0.0177 | 3.2000 | 1.1256 | 0.4821 | 3.90E-18 | 9.0 | 75.1 | 0.76 | ± | 0.92 |
| 27/2/6-03J | 1050 | 0.0228 | 5.3783 | 1.0001 | 0.7642 | 3.92E-18 | 10.9 | 79.8 | 1.20 | ± | 0.85 |
| 27/2/6-03K | 1150 | 0.0197 | 14.1516 | 0.2695 | 0.8015 | 9.88E-18 | 14.5 | 91.7 | 1.26 | ± | 0.36 |
| 27/2/6-03L | 1250 | 0.0596 | 99.2288 | 0.3177 | 1.6209 | 6.95E-18 | 13.5 | 100.0 | 2.55 | ± | 0.58 |
| **GDA138** | **groundmass** |  |  |  |  |  |  |  |  |  |  |
| Discrimination | 1.00093 |  | J Factor | 0.0008435 |  |  |  |  |  |  |  |
| (39Ar/37Ar)Ca | 0.00067 |  | Weight (mg) | 125.7 |  |  |  |  |  |  |  |
| (36Ar/37Ar)Ca | 0.00027 |  | Sens. (mol/mv) | 4.49 x10-17 |  |  |  |  |  |  |  |
| (38Ar/39Ar)K | 0.01077 |  |  |  |  |  |  |  |  |  |  |
| (40Ar/39Ar)K | 0.04950 |  | Plateau Age | 1.59±0.14 | Ma |  |  |  |  |  |  |
| Run ID# | Temp. (°C) | 36Ar/39Ar | 37Ar/39Ar | 38Ar/39Ar | 40Ar*/39Ar | Moles 39Ar | %40Ar* | Cum. %39Ar | Age (Ma) | ± | 1 s.d. |
| 27/2/14-01A | 560 | 0.0170 | 1.9934 | 1.4470 | 0.3807 | 2.33E-17 | 7.4 | 25.0 | 0.59 | ± | 0.21 |
| 27/2/14-01B | 600 | 0.0069 | 2.8114 | 1.2724 | 0.3295 | 5.28E-18 | 16.2 | 30.6 | 0.51 | ± | 0.88 |
| 27/2/14-01C | 640 | 0.0038 | 2.8534 | 1.3251 | 0.7525 | 1.56E-18 | 49.4 | 32.3 | 1.16 | ± | 3.07 |
| 27/2/14-01D | 680 | 0.0075 | 3.1837 | 1.2763 | 0.5452 | 1.39E-18 | 22.7 | 33.8 | 0.84 | ± | 3.52 |
| 27/2/14-01E | 760 | 0.0079 | 6.0125 | 0.9459 | 0.3857 | 2.00E-17 | 17.7 | 55.3 | 0.59 | ± | 0.22 |
| 27/2/14-01F | 820 | 0.0082 | 6.6780 | 1.0021 | 0.6104 | 6.89E-18 | 25.1 | 62.7 | 0.94 | ± | 0.63 |
| 27/2/14-01G | 870 | 0.0102 | 7.7699 | 0.9340 | 0.2153 | 4.44E-18 | 8.5 | 67.4 | 0.33 | ± | 0.99 |
| 27/2/14-01H | 930 | 0.0096 | 7.7559 | 0.7920 | 0.4837 | 4.04E-18 | 18.2 | 71.7 | 0.74 | ± | 1.06 |
| 27/2/14-01I | 980 | 0.0099 | 7.4138 | 0.6954 | 0.6178 | 2.60E-18 | 21.3 | 74.5 | 0.95 | ± | 1.64 |
| 27/2/14-01J | 1030 | 0.0113 | 7.6911 | 0.5776 | 1.0681 | 1.96E-18 | 28.3 | 76.6 | 1.64 | ± | 2.22 |
| 27/2/14-01K | 1080 | 0.0104 | 9.1102 | 0.5593 | 2.2738 | 1.91E-18 | 49.5 | 78.7 | 3.49 | ± | 2.27 |
| 27/2/14-01L | 1140 | 0.0116 | 12.2725 | 0.6828 | 0.7445 | 4.40E-18 | 23.6 | 83.4 | 1.14 | ± | 0.98 |
| 27/2/14-01M | 1250 | 0.0165 | 31.4352 | 0.7101 | 0.2168 | 1.41E-17 | 8.3 | 98.6 | 0.33 | ± | 0.33 |
| 27/2/14-01N | 1450 | 0.1080 | 72.6018 | 0.7521 | 1.3960 | 1.33E-18 | 4.8 | 100.0 | 2.15 | ± | 3.64 |
| **GDA143a** | **groundmass** |  |  |  |  |  |  |  |  |  |  |
| Discrimination | 1.00093 |  | J Factor | 0.003685 |  |  |  |  |  |  |  |
| (39Ar/37Ar)Ca | 0.00067 |  | Weight (mg) | 74.9 |  |  |  |  |  |  |  |
| (36Ar/37Ar)Ca | 0.00027 |  | Sens. (mol/mv) | 4.49 x10-17 |  |  |  |  |  |  |  |
| (38Ar/39Ar)K | 0.01077 |  |  |  |  |  |  |  |  |  |  |
| (40Ar/39Ar)K | 0.04950 |  | Plateau Age | 37.6±0.6 | Ma |  |  |  |  |  |  |
| Run ID# | Temp. (°C) | 36Ar/39Ar | 37Ar/39Ar | 38Ar/39Ar | 40Ar*/39Ar | Moles 39Ar | %40Ar* | Cum. %39Ar | Age (Ma) | ± | 1 s.d. |
| 30/4/6-03A | 600 | 0.0065 | 2.0015 | 6.5874 | 23.3320 | 2.08E-16 | 11.1 | 41.5 | 36.53 | ± | 3.11 |
| 30/4/6-03B | 650 | 0.0074 | 2.2587 | 5.9874 | 25.7691 | 2.25E-17 | 14.4 | 46.0 | 40.34 | ± | 2.19 |
| 30/4/6-03C | 700 | 0.0044 | 2.9842 | 5.2149 | 28.3160 | 5.50E-18 | 44.3 | 47.1 | 44.33 | ± | 10.36 |
| 30/4/6-03D | 770 | 0.0097 | 3.2584 | 4.2882 | 24.1551 | 7.50E-17 | 25.4 | 62.1 | 37.82 | ± | 1.52 |
| 30/4/6-03E | 850 | 0.0077 | 3.6944 | 3.3698 | 23.1512 | 7.50E-17 | 36.6 | 77.1 | 36.25 | ± | 0.92 |
| 30/4/6-03F | 925 | 0.0085 | 4.2590 | 3.0258 | 23.5160 | 3.10E-17 | 24.5 | 83.3 | 36.82 | ± | 1.49 |
| 30/4/6-03G | 1000 | 0.0093 | 6.2489 | 1.5874 | 24.3553 | 1.25E-17 | 28.9 | 85.8 | 38.13 | ± | 4.98 |
| 30/4/6-03H | 1100 | 0.0113 | 8.5155 | 1.0258 | 24.4360 | 1.10E-17 | 29.6 | 88.0 | 38.26 | ± | 4.30 |
| 30/4/6-03J | 1200 | 0.0079 | 9.2584 | 1.2589 | 24.1099 | 3.75E-17 | 33.3 | 95.5 | 37.75 | ± | 0.55 |
| 30/4/6-03K | 1450 | 0.0048 | 16.3258 | 0.9982 | 24.6458 | 2.25E-17 | 24.1 | 100.0 | 38.59 | ± | 2.65 |
| **GDA143b** | **groundmass** |  |  |  |  |  |  |  |  |  |  |
| Discrimination | 1.00093 |  | J Factor | 0.00374 |  |  |  |  |  |  |  |
| (39Ar/37Ar)Ca | 0.00067 |  | Weight (mg) | 75.5 |  |  |  |  |  |  |  |
| (36Ar/37Ar)Ca | 0.00027 |  | Sens. (mol/mv) | 4.49 x10-17 |  |  |  |  |  |  |  |
| (38Ar/39Ar)K | 0.01077 |  |  |  |  |  |  |  |  |  |  |
| (40Ar/39Ar)K | 0.04950 |  | Plateau Age | 38.4±0.2 | Ma |  |  |  |  |  |  |
| Run ID# | Temp. (°C) | 36Ar/39Ar | 37Ar/39Ar | 38Ar/39Ar | 40Ar*/39Ar | Moles 39Ar | %40Ar* | Cum. %39Ar | Age (Ma) | ± | 1 s.d. |
| 30/4/6-03A | 550 | 0.0111 | 2.2871 | 1.6872 | 24.0873 | 1.71E-18 | 14.8 | 1.8 | 37.71 | ± | 5.57 |
| 30/4/6-03B | 600 | 0.0259 | 3.0509 | 1.1691 | 25.1364 | 2.28E-18 | 22.0 | 2.4 | 39.35 | ± | 6.29 |
| 30/4/6-03C | 640 | 0.0300 | 2.5274 | 1.1848 | 24.7297 | 3.45E-17 | 21.0 | 36.3 | 38.72 | ± | 2.13 |
| 30/4/6-03D | 680 | 0.2987 | 2.9434 | 1.4075 | 25.9693 | 3.73E-17 | 33.3 | 39.3 | 40.66 | ± | 4.88 |
| 30/4/6-03E | 720 | 0.0222 | 4.9413 | 0.9553 | 24.9847 | 4.52E-17 | 18.2 | 47.6 | 39.12 | ± | 0.86 |
| 30/4/6-03F | 760 | 0.0037 | 6.6201 | 1.0964 | 25.2559 | 5.57E-17 | 40.5 | 58.6 | 39.54 | ± | 0.43 |
| 30/4/6-03G | 800 | 0.0041 | 7.4330 | 1.0264 | 24.7233 | 6.23E-17 | 44.6 | 65.5 | 38.71 | ± | 0.55 |
| 30/4/6-03H | 850 | 0.0052 | 9.2451 | 0.6657 | 25.1138 | 6.77E-17 | 50.9 | 71.3 | 39.32 | ± | 0.25 |
| 30/4/6-03I | 900 | 0.0052 | 8.4642 | 0.6777 | 24.3262 | 7.57E-17 | 60.5 | 79.7 | 38.09 | ± | 0.56 |
| 30/4/6-03J | 950 | 0.0074 | 8.5338 | 0.5912 | 23.4805 | 7.86E-17 | 42.5 | 82.7 | 36.76 | ± | 0.94 |
| 30/4/6-03K | 1000 | 0.0144 | 8.8239 | 0.5215 | 24.0292 | 8.13E-17 | 51.2 | 85.6 | 37.62 | ± | 0.99 |
| 30/4/6-03L | 1050 | 0.0312 | 8.5500 | 0.5221 | 23.9356 | 8.44E-17 | 56.2 | 88.9 | 37.47 | ± | 0.74 |
| 30/4/6-03M | 1100 | 0.0428 | 9.5800 | 0.6528 | 24.0744 | 8.71E-17 | 44.2 | 91.7 | 37.69 | ± | 1.90 |
| 30/4/6-03N | 1150 | 0.0325 | 10.2500 | 0.8484 | 25.2107 | 8.84E-17 | 25.1 | 93.1 | 39.47 | ± | 2.89 |
| 30/4/6-03O | 1200 | 0.0233 | 10.8400 | 0.7412 | 24.5167 | 9.00E-17 | 20.7 | 94.7 | 38.38 | ± | 1.20 |
| 30/4/6-03P | 1250 | 0.0245 | 11.2527 | 0.6763 | 24.6070 | 9.18E-17 | 8.6 | 96.7 | 38.52 | ± | 1.06 |
| 30/4/6-03Q | 1300 | 0.0925 | 35.9811 | 0.7216 | 24.0551 | 9.38E-17 | 6.5 | 98.7 | 37.66 | ± | 1.47 |
| 30/4/6-03R | 1550 | 0.1598 | 74.2306 | 0.8094 | 22.9575 | 9.50E-17 | 8.5 | 100.0 | 35.94 | ± | 3.58 |
| **GDA145** | **groundmass** |  |  |  |  |  |  |  |  |  |  |
| Discrimination | 0.998 |  | J Factor | 0.006860 |  |  |  |  |  |  |  |
| (39Ar/37Ar)Ca | 0.0000191 |  | Weight (mg) | 88.4 |  |  |  |  |  |  |  |
| (36Ar/37Ar)Ca | 0.0000387 |  | Sens. (mol/mv) | 3.26 x10-17 |  |  |  |  |  |  |  |
| (38Ar/39Ar)K | 0.01077 |  |  |  |  |  |  |  |  |  |  |
| (40Ar/39Ar)K | 0.01488 |  | Plateau Age | 6.06±0.06 | Ma |  |  |  |  |  |  |
| Run ID# | Temp. (°C) | 36Ar/39Ar | 37Ar/39Ar | 38Ar/39Ar | 40Ar*/39Ar | Moles 39Ar | %40Ar* | Cum. %39Ar | Age (Ma) | ± | 1 s.d. |
| 25/4/20-01A | 600 | 0.1107 | 13.7403 | 0.0077 | 0.6038 | 1.44E-16 | 1.8 | 11.7 | 7.54 | ± | 2.29 |
| 25/4/20-01B | 650 | 0.0159 | 13.5748 | 0.0078 | 0.3089 | 7.96E-18 | 6.4 | 12.3 | 3.86 | ± | 0.76 |
| 25/4/20-01C | 700 | 0.0151 | 13.2765 | 0.0100 | 0.3543 | 3.57E-18 | 7.6 | 12.6 | 4.43 | ± | 1.31 |
| 25/4/20-01D | 750 | 0.0018 | 7.8125 | 0.0018 | 0.4942 | 3.99E-16 | 52.4 | 45.0 | 6.17 | ± | 0.06 |
| 25/4/20-01E | 800 | 0.0017 | 8.4162 | 0.0042 | 0.4620 | 9.10E-17 | 54 | 52.3 | 5.77 | ± | 0.68 |
| 25/4/20-01F | 850 | 0.0013 | 9.0720 | 0.0028 | 0.4811 | 9.37E-17 | 63.3 | 59.9 | 6.01 | ± | 0.07 |
| 25/4/20-01G | 900 | 0.0013 | 6.6328 | 0.0043 | 0.4887 | 8.41E-17 | 61.4 | 66.8 | 6.10 | ± | 0.07 |
| 25/4/20-01I | 950 | 0.0034 | 0.4562 | 0.0003 | 0.4717 | 6.52E-17 | 32.3 | 72.1 | 5.89 | ± | 0.18 |
| 25/4/20-01J | 1000 | 0.0032 | 11.5040 | 0.0093 | 0.4731 | 3.24E-16 | 36.8 | 98.3 | 5.91 | ± | 0.10 |
| 25/4/20-01K | 1060 | 0.0178 | 253.8064 | 0.0915 | 0.7144 | 4.96E-18 | 23.3 | 98.8 | 8.91 | ± | 1.03 |
| 25/4/20-01L | 1120 | 0.0228 | 376.2183 | 0.0766 | 0.9399 | 6.32E-18 | 27.8 | 99.3 | 11.72 | ± | 0.95 |
| 25/4/20-01M | 1250 | 0.0143 | 136.0179 | 0.0842 | 0.8982 | 7.74E-18 | 25.2 | 99.9 | 11.20 | ± | 0.69 |
| 25/4/20-01N | 1450 | 0.0159 | 117.8441 | 0.0560 | 2.3591 | 1.30E-18 | 41.4 | 100.0 | 29.27 | ± | 4.34 |
| 25/4/20-01O | 1550 | 2.9173 | 1459.4000 | 4.5277 | -692.3262 | 1.15E-20 | 2.2 | 100.0 | 0.00 | ± | 278.00 |
| **GDA146** | **groundmass** |  |  |  |  |  |  |  |  |  |  |
| Discrimination | 1.00254 |  | J Factor | 0.006791 |  |  |  |  |  |  |  |
| (39Ar/37Ar)Ca | 0.0000191 |  | Weight (mg) | 127.8 |  |  |  |  |  |  |  |
| (36Ar/37Ar)Ca | 0.0000387 |  | Sens. (mol/mv) | 4.04 x10-17 |  |  |  |  |  |  |  |
| (38Ar/39Ar)K | 0.01077 |  |  |  |  |  |  |  |  |  |  |
| (40Ar/39Ar)K | 0.01488 |  | Plateau Age | 5.83±0.09 | Ma |  |  |  |  |  |  |
| Run ID# | Temp. (°C) | 36Ar/39Ar | 37Ar/39Ar | 38Ar/39Ar | 40Ar*/39Ar | Moles 39Ar | %40Ar* | Cum. %39Ar | Age (Ma) | ± | 1 s.d. |
| 25/5/3-01A | 600 | 0.3595 | 13.6846 | 0.7618 | 1.3118 | 1.66E-17 | 1.2 | 0.9 | 16.17 | ± | 22.28 |
| 25/5/3-01B | 646 | 0.5257 | 0.0000 | 0.5066 | 19.2129 | 1.02E-20 | 11.0 | 0.9 | 223.63 | ± | 949.99 |
| 25/5/3-01C | 750 | 0.0183 | 14.9986 | 1.7617 | 0.4486 | 1.15E-16 | 8.1 | 6.8 | 5.55 | ± | 0.86 |
| 25/5/3-01D | 800 | 0.0044 | 6.8818 | 0.2690 | 0.4979 | 7.52E-17 | 29.3 | 10.7 | 6.16 | ± | 0.23 |
| 25/5/3-01E | 876 | 0.0013 | 6.2776 | 0.0775 | 0.4645 | 2.87E-16 | 61.0 | 25.5 | 5.74 | ± | 0.08 |
| 25/5/3-01F | 925 | 0.0007 | 5.8923 | 0.0247 | 0.4626 | 3.09E-16 | 78.8 | 41.5 | 5.72 | ± | 0.06 |
| 25/5/3-01G | 960 | 0.0008 | 8.6590 | 0.0602 | 0.4750 | 1.93E-16 | 80.1 | 51.5 | 5.87 | ± | 0.07 |
| 25/5/3-01H | 1000 | 0.0007 | 10.4127 | 0.0823 | 0.4967 | 1.37E-16 | 85.5 | 58.5 | 6.14 | ± | 0.08 |
| 25/5/3-01I | 1040 | 0.0006 | 9.5722 | 0.0540 | 0.5116 | 1.08E-16 | 89.0 | 64.1 | 6.32 | ± | 0.08 |
| 25/5/3-01J | 1080 | 0.0005 | 8.6759 | 0.0475 | 0.5215 | 7.51E-17 | 90.1 | 68.0 | 6.45 | ± | 0.10 |
| 25/5/3-01K | 1120 | 0.0005 | 7.2692 | 0.0246 | 0.5021 | 9.92E-17 | 89.0 | 73.1 | 6.21 | ± | 0.08 |
| 25/5/3-01L | 1170 | 0.0005 | 6.8235 | 0.0160 | 0.4773 | 1.53E-16 | 87.8 | 81.1 | 5.90 | ± | 0.06 |
| 25/5/3-01M | 1250 | 0.0012 | 25.0311 | 0.0165 | 0.4764 | 1.84E-16 | 87.0 | 90.6 | 5.89 | ± | 0.09 |
| 25/5/3-01N | 1300 | 0.0042 | 92.2435 | 0.0219 | 0.4295 | 1.25E-16 | 69.8 | 97.0 | 5.31 | ± | 0.29 |
| 25/5/3-01O | 1400 | 0.0070 | 168.1991 | 0.0247 | 0.5670 | 5.63E-17 | 79.0 | 99.9 | 7.01 | ± | 0.47 |
| 25/5/3-01P | 1600 | 0.0454 | 410.7199 | 0.0975 | -2.3057 | 1.12E-18 | -35.6 | 100.0 | -28.78 | ± | 3.57 |
| **GDA148** | **groundmass** |  |  |  |  |  |  |  |  |  |  |
| Discrimination | 1.00254 |  | J Factor | 0.003685 |  |  |  |  |  |  |  |
| (39Ar/37Ar)Ca | 0.0000191 |  | Weight (mg) | 151.9 |  |  |  |  |  |  |  |
| (36Ar/37Ar)Ca | 0.0000387 |  | Sens. (mol/mv) | 4.04 x10-17 |  |  |  |  |  |  |  |
| (38Ar/39Ar)K | 0.01077 |  |  |  |  |  |  |  |  |  |  |
| (40Ar/39Ar)K | 0.01488 |  | Plateau Age | 1.90±0.03 | Ma |  |  |  |  |  |  |
| Run ID# | Temp. (°C) | 36Ar/39Ar | 37Ar/39Ar | 38Ar/39Ar | 40Ar*/39Ar | Moles 39Ar | %40Ar* | Cum. %39Ar | Age (Ma) | ± | 1 s.d. |
| 30/4/12-01A | 700 | 0.00139 | 4.32589 | 6.2587 | 8.2475 | 4.00E-18 | 5.2 | 0.8 | 12.91 | ± | 4.38 |
| 30/4/12-01B | 725 | 0.00053 | 5.21478 | 4.2589 | 1.9239 | 5.16E-17 | 8.3 | 11.1 | 3.01 | ± | 0.34 |
| 30/4/12-01C | 750 | 0.00155 | 5.99874 | 2.2598 | 2.1660 | -1.31E-17 | 23.0 | 8.5 | 3.39 | ± | 0.15 |
| 30/4/12-01D | 780 | 0.00149 | 7.54180 | 2.2587 | 1.5365 | 2.75E-17 | 37.7 | 14.0 | 2.41 | ± | 0.15 |
| 30/4/12-01E | 810 | 0.00142 | 8.69500 | 2.3694 | 1.3138 | 4.50E-17 | 41.4 | 23.0 | 2.06 | ± | 0.10 |
| 30/4/12-01F | 840 | 0.00187 | 10.25800 | 1.9873 | 1.1750 | 5.00E-17 | 60.2 | 33.0 | 1.84 | ± | 0.10 |
| 30/4/12-01G | 870 | 0.00181 | 12.36580 | 1.9866 | 1.1782 | 5.50E-17 | 65.0 | 44.0 | 1.84 | ± | 0.08 |
| 30/4/12-01H | 900 | 0.00222 | 13.32580 | 1.0259 | 1.1653 | 5.75E-17 | 72.0 | 55.5 | 1.82 | ± | 0.06 |
| 30/4/12-01I | 950 | 0.00161 | 16.84410 | 1.0685 | 1.1621 | 7.15E-17 | 68.0 | 69.8 | 1.82 | ± | 0.10 |
| 30/4/12-01J | 1000 | 0.00098 | 20.25890 | 1.3658 | 1.3106 | 4.70E-17 | 76.0 | 79.2 | 2.05 | ± | 0.16 |
| 30/4/12-01K | 1050 | 0.00138 | 24.84550 | 0.9846 | 1.3590 | 2.40E-17 | 52.0 | 84.0 | 2.13 | ± | 0.14 |
| 30/4/12-01L | 1125 | 0.00238 | 29.36450 | 0.9561 | 1.2363 | 2.00E-17 | 22.0 | 88.0 | 1.94 | ± | 0.17 |
| 30/4/12-01M | 1200 | 0.00174 | 30.84440 | 0.8456 | 1.3396 | 1.40E-17 | 65.0 | 90.8 | 2.10 | ± | 0.40 |
| 30/4/12-01N | 1300 | 0.00061 | 32.10002 | 0.7853 | 1.3267 | 1.80E-17 | 74.4 | 94.4 | 2.08 | ± | 0.36 |
| 30/4/12-01O | 1500 | 0.00137 | 49.84810 | 0.8654 | 1.3073 | 2.80E-17 | 41.0 | 100.0 | 2.05 | ± | 1.79 |
| **GDA159A** | **amphibole** |  |  |  |  |  |  |  |  |  |  |
| Discrimination | 0.99595 |  | J Factor | 0.000360 |  |  |  |  |  |  |  |
| (39Ar/37Ar)Ca | 0.00067 |  | Weight (mg) | 71.2 |  |  |  |  |  |  |  |
| (36Ar/37Ar)Ca | 0.00027 |  | Sens. (mol/mv) | 3.43 x10-17 |  |  |  |  |  |  |  |
| (38Ar/39Ar)K | 0.01077 |  |  |  |  |  |  |  |  |  |  |
| (40Ar/39Ar)K | 0.04950 |  | Plateau Age | 0.72±0.16 | Ma |  |  |  |  |  |  |
| Run ID# | Temp. (°C) | 36Ar/39Ar | 37Ar/39Ar | 38Ar/39Ar | 40Ar*/39Ar | Moles 39Ar | %40Ar* | Cum. %39Ar | Age (Ma) | ± | 1 s.d. |
| 27/3/4-01B | 769 | 0.0996 | 1.7357 | 0.2717 | 0.8191 | 5.68E-19 | 2.7 | 2.5 | 0.57 | ± | 3.72 |
| 27/3/4-01C | 825 | 2.4702 | 13.4288 | 0.2130 | 468.7941 | 1.08E-21 | 38.9 | 2.5 | 302.56 | ± | 41964.02 |
| 27/3/4-01D | 875 | 0.0248 | 2.0520 | 0.4005 | 14.0568 | 9.63E-20 | 66.3 | 2.9 | 9.84 | ± | 16.46 |
| 27/3/4-01E | 950 | 0.0848 | 2.3397 | 0.5738 | 3.1022 | 8.63E-20 | 11.1 | 3.3 | 2.18 | ± | 22.45 |
| 27/3/4-01F | 1025 | 0.0453 | 10.4265 | 2.0950 | 0.2333 | 6.62E-19 | 1.8 | 6.2 | 0.16 | ± | 2.29 |
| 27/3/4-01G | 1075 | 0.0178 | 15.6500 | 2.9775 | 1.2004 | 7.48E-18 | 23.5 | 38.9 | 0.84 | ± | 0.19 |
| 27/3/4-01H | 1100 | 0.0092 | 14.7878 | 2.7205 | 0.9128 | 8.15E-18 | 39.2 | 74.6 | 0.64 | ± | 0.17 |
| 27/3/4-01I | 1120 | 0.0120 | 12.6555 | 1.3549 | 0.7113 | 9.06E-19 | 22.2 | 78.5 | 0.50 | ± | 1.54 |
| 27/3/4-01J | 1160 | 0.0167 | 14.0582 | 2.4935 | 0.5931 | 1.66E-18 | 13.7 | 85.8 | 0.42 | ± | 0.85 |
| 27/3/4-01K | 1500 | 0.0057 | 0.9349 | 0.1713 | 10.9641 | 7.92E-19 | 87.2 | 89.3 | 7.68 | ± | 1.86 |
| 27/3/4-01L | 1500 | 0.0057 | 0.9349 | 0.1713 | 10.9641 | 7.92E-19 | 87.2 | 92.7 | 7.68 | ± | 1.86 |
| 27/3/4-01LL | 1275 | 0.2346 | 23.1875 | 4.7080 | -33.1913 | 3.09E-20 | -94.6 | 92.9 | -23.45 | ± | 110.23 |
| 27/3/4-01M | 1500 | 0.0057 | 0.9349 | 0.1713 | 10.9641 | 7.92E-19 | 87.2 | 96.3 | 7.68 | ± | 1.86 |
| 27/3/4-01MM | 1500 | 0.0082 | 0.9411 | 0.1713 | 10.0942 | 8.37E-19 | 81.2 | 100.0 | 7.07 | ± | 1.77 |
| **GDA161a** | **groundmass** |  |  |  |  |  |  |  |  |  |  |
| Discrimination | 0.99595 |  | J Factor | 0.003625 |  |  |  |  |  |  |  |
| (39Ar/37Ar)Ca | 0.00067 |  | Weight (mg) | 78.4 |  |  |  |  |  |  |  |
| (36Ar/37Ar)Ca | 0.00027 |  | Sens. (mol/mv) | 3.43 x10-17 |  |  |  |  |  |  |  |
| (38Ar/39Ar)K | 0.01077 |  |  |  |  |  |  |  |  |  |  |
| (40Ar/39Ar)K | 0.04950 |  | Plateau Age | 4.35±0.30 | Ma |  |  |  |  |  |  |
| Run ID# | Temp. (°C) | 36Ar/39Ar | 37Ar/39Ar | 38Ar/39Ar | 40Ar*/39Ar | Moles 39Ar | %40Ar* | Cum. %39Ar | Age (Ma) | ± | 1 s.d. |
| 30/4/16-01A | 580 | 0.003045 | 2.00258 | 2.3658 | 13.8361 | 1.25E-17 | 7.1 | 0.1 | 21.61 | ± | 7.15 |
| 30/4/16-01B | 650 | 0.001202 | 2.9996 | 2.6949 | 4.6616 | 1.25E-17 | 10.4 | 1.3 | 7.28 | ± | 2.72 |
| 30/4/16-01C | 700 | 0.001343 | 3.3695 | 1.2659 | 3.0344 | 8.00E-18 | 22.3 | 7.4 | 4.74 | ± | 1.71 |
| 30/4/16-01E | 760 | 0.001846 | 4.2584 | 1.6487 | 3.1865 | 3.00E-18 | 36.5 | 14.6 | 4.98 | ± | 1.36 |
| 30/4/16-01D | 810 | 0.001955 | 5.2010 | 1.6589 | 3.0733 | 2.72E-16 | 50.1 | 24.1 | 4.80 | ± | 1.06 |
| 30/4/16-01F | 860 | 0.001634 | 6.5984 | 1.0258 | 2.6721 | 6.05E-17 | 60.2 | 37.6 | 4.17 | ± | 0.78 |
| 30/4/16-01G | 910 | 0.001250 | 8.0258 | 1.6500 | 2.7756 | 1.00E-17 | 55.4 | 52.5 | 4.34 | ± | 0.72 |
| 30/4/16-01H | 1000 | 0.001075 | 11.0250 | 0.9875 | 2.7433 | 3.90E-17 | 60.3 | 66.5 | 4.29 | ± | 0.67 |
| 30/4/16-01I | 1050 | 0.000856 | 15.2026 | 0.8457 | 2.4780 | 2.10E-17 | 66.4 | 79.0 | 3.87 | ± | 0.93 |
| 30/4/16-01J | 1100 | 0.000416 | 21.5811 | 0.8437 | 2.4101 | 2.40E-17 | 41.5 | 92.1 | 3.77 | ± | 0.83 |
| 30/4/16-01K | 1200 | 0.000532 | 24.0258 | 0.7517 | 2.5654 | 1.70E-17 | 62.3 | 99.5 | 4.01 | ± | 3.96 |
| 30/4/16-01L | 1400 | 0.000479 | 10.7897 | 0.6933 | 4.3252 | 2.10E-17 | 41.6 | 100.0 | 6.76 | ± | 7.27 |
| **GDA161b** | **groundmass** |  |  |  |  |  |  |  |  |  |  |
| Discrimination | 0.99595 |  | J Factor | 0.003592 |  |  |  |  |  |  |  |
| (39Ar/37Ar)Ca | 0.00067 |  | Weight (mg) | 76.6 |  |  |  |  |  |  |  |
| (36Ar/37Ar)Ca | 0.00027 |  | Sens. (mol/mv) | 3.43 x10-17 |  |  |  |  |  |  |  |
| (38Ar/39Ar)K | 0.01077 |  |  |  |  |  |  |  |  |  |  |
| (40Ar/39Ar)K | 0.04950 |  | Plateau Age | 4.62±0.04 | Ma |  |  |  |  |  |  |
| Run ID# | Temp. (°C) | 36Ar/39Ar | 37Ar/39Ar | 38Ar/39Ar | 40Ar*/39Ar | Moles 39Ar | %40Ar* | Cum. %39Ar | Age (Ma) | ± | 1 s.d. |
| 30/4/14-01A | 600 | 0.00081 | 2.15488 | 5.6597 | 2.9348 | 1.25E-17 | 8.5 | 0.5 | 4.60 | ± | 5.35 |
| 30/4/14-01B | 650 | 0.00101 | 2.44488 | 4.6597 | 2.3123 | 1.25E-17 | 14.6 | 4.0 | 3.62 | ± | 1.94 |
| 30/4/14-01C | 720 | 0.00195 | 2.12692 | 2.6844 | 3.0509 | 8.00E-18 | 25.6 | 5.8 | 4.78 | ± | 1.24 |
| 30/4/14-01D | 770 | 0.00276 | 2.24943 | 2.3695 | 3.0412 | 3.00E-18 | 41.2 | 11.6 | 4.77 | ± | 0.32 |
| 30/4/14-01E | 830 | 0.00301 | 9.25140 | 1.2655 | 2.9444 | 2.72E-16 | 48.6 | 34.0 | 4.61 | ± | 0.04 |
| 30/4/14-01F | 900 | 0.00264 | 11.02580 | 1.5449 | 2.8380 | 6.05E-17 | 50.6 | 44.4 | 4.45 | ± | 0.10 |
| 30/4/14-01G | 975 | 0.00236 | 22.10575 | 1.0259 | 3.0799 | 1.00E-17 | 55.5 | 54.6 | 4.83 | ± | 0.14 |
| 30/4/14-01H | 1050 | 0.00236 | 25.84215 | 0.9415 | 3.0089 | 3.90E-17 | 59.3 | 71.0 | 4.72 | ± | 0.14 |
| 30/4/14-01I | 1150 | 0.00213 | 30.21000 | 0.9120 | 2.9348 | 2.10E-17 | 60.4 | 87.8 | 4.60 | ± | 0.15 |
| 30/4/14-01J | 1400 | 0.00178 | 29.15800 | 0.8452 | 3.0444 | 2.40E-17 | 58.4 | 100.0 | 4.77 | ± | 0.20 |
| **GDA162** | **groundmass** |  |  |  |  |  |  |  |  |  |  |
| Discrimination | 0.99595 |  | J Factor | 0.003637 |  |  |  |  |  |  |  |
| (39Ar/37Ar)Ca | 0.00067 |  | Weight (mg) | 148.3 |  |  |  |  |  |  |  |
| (36Ar/37Ar)Ca | 0.00027 |  | Sens. (mol/mv) | 3.43 x10-17 |  |  |  |  |  |  |  |
| (38Ar/39Ar)K | 0.01077 |  |  |  |  |  |  |  |  |  |  |
| (40Ar/39Ar)K | 0.04950 |  |  | 2.74±0.42 | Ma |  |  |  |  |  |  |
| Run ID# | Temp. (°C) | 36Ar/39Ar | 37Ar/39Ar | 38Ar/39Ar | 40Ar*/39Ar | Moles 39Ar | %40Ar* | Cum. %39Ar | Age (Ma) | ± | 1 s.d. |
| 30/5/2-01A | 550 | 0.00023 | 10.7458 | 0.2717 | 1.5640 | 5.77E-15 | 4.5 | 4.9 | 3.39 | ± | 0.86 |
| 30/5/2-01B | 580 | 0.00019 | 9.7523 | 0.2130 | 0.9660 | 3.21E-15 | 6.3 | 7.6 | 2.09 | ± | 1.56 |
| 30/5/2-01C | 675 | 0.00023 | 9.3423 | 0.4005 | 1.3180 | 1.61E-14 | 5.8 | 21.4 | 2.85 | ± | 0.31 |
| 30/5/2-01D | 740 | 0.00047 | 11.7730 | 0.3955 | 1.1530 | 2.04E-14 | 16.6 | 38.8 | 2.50 | ± | 0.24 |
| 30/5/2-01E | 860 | 0.00100 | 9.1424 | 0.0637 | 1.1980 | 2.67E-14 | 42.3 | 61.6 | 2.59 | ± | 0.19 |
| 30/5/2-01F | 920 | 0.00101 | 6.0716 | 0.0728 | 1.9120 | 7.67E-15 | 54.5 | 68.2 | 4.13 | ± | 0.66 |
| 30/5/2-01G | 1000 | 0.00131 | 6.4994 | 0.1462 | 1.3999 | 7.07E-15 | 56.7 | 74.2 | 3.02 | ± | 0.71 |
| 30/5/2-01H | 1200 | 0.00115 | 1.5615 | 0.2220 | 1.3456 | 2.14E-14 | 34.5 | 92.4 | 2.93 | ± | 0.26 |
| 30/5/2-01J | 1550 | 0.00053 | 0.3073 | 0.2345 | 1.4777 | 8.94E-15 | 10.1 | 100.0 | 3.19 | ± | 1.02 |
| **GDA163** | **groundmass** |  |  |  |  |  |  |  |  |  |  |
| Discrimination | 0.99595 |  | J Factor | 0.003663 |  |  |  |  |  |  |  |
| (39Ar/37Ar)Ca | 0.00067 |  | Weight (mg) | 148.7 |  |  |  |  |  |  |  |
| (36Ar/37Ar)Ca | 0.00027 |  | Sens. (mol/mv) | 3.43 x10-17 |  |  |  |  |  |  |  |
| (38Ar/39Ar)K | 0.01077 |  |  |  |  |  |  |  |  |  |  |
| (40Ar/39Ar)K | 0.04950 |  | Plateau Age | 0.52±0.03 | Ma |  |  |  |  |  |  |
| Run ID# | Temp. (°C) | 36Ar/39Ar | 37Ar/39Ar | 38Ar/39Ar | 40Ar*/39Ar | Moles 39Ar | %40Ar* | Cum. %39Ar | Age (Ma) | ± | 1 s.d. |
| 30/5/6-01A | 700 | 0.00006 | 5.3699 | 5.6710 | 0.2903 | 9.94E-17 | 6.2 | 14.2 | 0.45 | ± | 0.07 |
| 30/5/6-01B | 750 | 0.00009 | 6.5413 | 3.6544 | 0.3257 | 2.66E-17 | 9.4 | 18.0 | 0.51 | ± | 0.20 |
| 30/5/6-01C | 800 | 0.00005 | 7.4590 | 1.2690 | 0.2000 | 8.05E-17 | 8.1 | 29.5 | 0.31 | ± | 0.23 |
| 30/5/6-01D | 850 | 0.00007 | 8.5253 | 0.5419 | 0.2419 | 4.62E-17 | 10.2 | 36.1 | 0.38 | ± | 0.14 |
| 30/5/6-01E | 900 | 0.00021 | 8.9498 | 0.6217 | 0.3677 | 5.67E-17 | 24.2 | 44.2 | 0.58 | ± | 0.09 |
| 30/5/6-01F | 950 | 0.00018 | 10.0259 | 0.6516 | 0.3483 | 7.07E-17 | 21.1 | 54.3 | 0.55 | ± | 0.06 |
| 30/5/6-01G | 1000 | 0.00021 | 11.0056 | 0.4897 | 0.3386 | 6.51E-17 | 24.6 | 63.6 | 0.53 | ± | 0.08 |
| 30/5/6-01H | 1100 | 0.00032 | 13.0059 | 0.5481 | 0.4644 | 6.58E-17 | 32.1 | 73.0 | 0.73 | ± | 0.05 |
| 30/5/6-01I | 1200 | 0.00034 | 14.1414 | 0.8844 | 0.6289 | 1.19E-16 | 28.3 | 90.0 | 0.99 | ± | 0.04 |
| 30/5/6-01J | 1400 | 0.00026 | 2.3944 | 0.9514 | 0.5805 | 7.00E-17 | 33.6 | 100.0 | 0.91 | ± | 0.21 |
| **X28118** | **groundmass** |  |  |  |  |  |  |  |  |  |  |
| Discrimination | 0.99595 |  | J Factor | 0.003385 |  |  |  |  |  |  |  |
| (39Ar/37Ar)Ca | 0.00067 |  | Weight (mg) | 166.4 |  |  |  |  |  |  |  |
| (36Ar/37Ar)Ca | 0.00027 |  | Sens. (mol/mv) | 3.43 x10-17 |  |  |  |  |  |  |  |
| (38Ar/39Ar)K | 0.01077 |  |  |  |  |  |  |  |  |  |  |
| (40Ar/39Ar)K | 0.04950 |  | Plateau Age | 0.30±0.05 | Ma |  |  |  |  |  |  |
| Run ID# | Temp. (°C) | 36Ar/39Ar | 37Ar/39Ar | 38Ar/39Ar | 40Ar*/39Ar | Moles 39Ar | %40Ar* | Cum. %39Ar | Age (Ma) | ± | 1 s.d. |
| 30/4/18-02A | 730 | 0.000004 | 4.1234 | 9.5843 | 0.1322 | 8.25E-17 | 0.9 | 16.5 | 0.21 | ± | 3.99 |
| 30/4/18-02B | 755 | 0.000014 | 5.2698 | 7.2584 | 0.3709 | 5.00E-17 | 1.2 | 26.5 | 0.58 | ± | 1.09 |
| 30/4/18-02C | 810 | 0.000003 | 6.2674 | 6.2568 | 0.0968 | 9.25E-17 | 1.0 | 45.0 | 0.15 | ± | 0.81 |
| 30/4/18-02D | 850 | 0.000009 | 6.9584 | 4.2055 | 0.2322 | 5.20E-17 | 1.2 | 55.4 | 0.36 | ± | 1.29 |
| 30/4/18-02E | 890 | 0.000003 | 8.1003 | 2.2589 | 0.1290 | 4.00E-17 | 0.7 | 63.4 | 0.20 | ± | 1.72 |
| 30/4/18-02F | 930 | -0.000009 | 8.9958 | 2.6401 | -0.4580 | 3.80E-17 | 0.6 | 71.0 | -0.72 | ± | 2.62 |
| 30/4/18-02G | 970 | -0.000003 | 9.2158 | 1.9846 | -0.1097 | 3.70E-17 | 0.7 | 78.4 | -0.17 | ± | 3.04 |
| 30/4/18-02H | 1010 | 0.000014 | 10.3258 | 1.2580 | 0.5192 | 2.70E-17 | 0.8 | 83.8 | 0.81 | ± | 3.04 |
| 30/4/18-02I | 1050 | 0.000096 | 11.2006 | 1.0844 | 2.8380 | 1.60E-17 | 1.7 | 87.0 | 4.45 | ± | 4.29 |
| 30/4/18-02J | 1090 | 0.000288 | 13.5444 | 1.1115 | 1.7996 | 1.05E-17 | 6.2 | 89.1 | 2.82 | ± | 5.88 |
| 30/4/18-02K | 1140 | 0.000236 | 12.6894 | 1.2484 | 1.5964 | 9.50E-18 | 5.21 | 91.0 | 2.50 | ± | 7.65 |
| 30/4/18-02L | 1190 | 0.000009 | 11.6594 | 0.9519 | 0.3290 | 5.50E-18 | 0.9 | 92.1 | 0.52 | ± | 7.01 |
| 30/4/18-02M | 1250 | 0.000098 | 9.9548 | 0.9618 | 5.3858 | 9.50E-18 | 0.6 | 94.0 | 8.44 | ± | 9.87 |
| 30/4/18-02N | 1300 | 0.000051 | 7.5844 | 0.8484 | 2.3317 | 1.50E-17 | 0.7 | 97.0 | 3.65 | ± | 5.32 |
| 30/4/18-02O | 1350 | 0.000042 | 8.6547 | 0.7511 | 4.0313 | 1.05E-17 | 0.5 | 99.1 | 6.32 | ± | 11.17 |
| 30/4/18-02P | 1500 | 0.000184 | 8.2001 | 2.1584 | 5.7728 | 4.50E-18 | 1.6 | 100.0 | 9.05 | ± | 15.32 |
| **X28173** | **groundmass** |  |  |  |  |  |  |  |  |  |  |
| Discrimination | 0.99604 |  | J Factor | 0.0008395 |  |  |  |  |  |  |  |
| (39Ar/37Ar)Ca | 0.00067 |  | Weight (mg) | 129.7 |  |  |  |  |  |  |  |
| (36Ar/37Ar)Ca | 0.00027 |  | Sens. (mol/mv) | 3.39 x10-17 |  |  |  |  |  |  |  |
| (38Ar/39Ar)K | 0.01077 |  |  |  |  |  |  |  |  |  |  |
| (40Ar/39Ar)K | 0.04950 |  | Plateau Age | 0.64±0.04 | Ma |  |  |  |  |  |  |
| Run ID# | Temp. (°C) | 36Ar/39Ar | 37Ar/39Ar | 38Ar/39Ar | 40Ar*/39Ar | Moles 39Ar | %40Ar* | Cum. %39Ar | Age (Ma) | ± | 1 s.d. |
| 27/1/7-01A | 600 | 0.0205 | 3.5455 | 6.9387 | 0.5047 | 1.22E-17 | 8.9 | 6.0 | 0.77 | ± | 0.30 |
| 27/1/7-01B | 609 | 0.0091 | 2.3872 | 5.7968 | 0.2534 | 1.82E-18 | 11.3 | 6.9 | 0.39 | ± | 1.99 |
| 27/1/7-01C | 750 | 0.0031 | 1.3988 | 1.9563 | 0.4106 | 7.34E-17 | 39.7 | 43.1 | 0.63 | ± | 0.05 |
| 27/1/7-01D | 850 | 0.0017 | 1.4997 | 0.3955 | 0.4048 | 6.16E-17 | 53.5 | 73.5 | 0.62 | ± | 0.06 |
| 27/1/7-01E | 950 | 0.0029 | 3.3564 | 0.0637 | 0.4458 | 2.52E-17 | 43.3 | 85.9 | 0.68 | ± | 0.14 |
| 27/1/7-01F | 1100 | 0.0085 | 3.9096 | 0.0728 | 0.2661 | 8.63E-18 | 10.7 | 90.2 | 0.41 | ± | 0.41 |
| 27/1/7-01G | 1400 | 0.0213 | 45.8031 | 0.1462 | 0.5173 | 2.00E-17 | 15.8 | 100.0 | 0.79 | ± | 0.21 |
| **X28182** | **groundmass** |  |  |  |  |  |  |  |  |  |  |
| Discrimination | 1.00046 |  | J Factor | 0.000863 |  |  |  |  |  |  |  |
| (39Ar/37Ar)Ca | 0.00067 |  | Weight (mg) | 125.0 |  |  |  |  |  |  |  |
| (36Ar/37Ar)Ca | 0.00027 |  | Sens. (mol/mv) | 3.47 x10-17 |  |  |  |  |  |  |  |
| (38Ar/39Ar)K | 0.01077 |  |  |  |  |  |  |  |  |  |  |
| (40Ar/39Ar)K | 0.04950 |  | Plateau Age | 1.82±0.30 | Ma |  |  |  |  |  |  |
| Run ID# | Temp. (°C) | 36Ar/39Ar | 37Ar/39Ar | 38Ar/39Ar | 40Ar*/39Ar | Moles 39Ar | %40Ar* | Cum. %39Ar | Age (Ma) | ± | 1 s.d. |
| 27/4/6-01A | 600 | 0.4311 | 6.6687 | 5.3405 | 1.8369 | 2.09E-18 | 1.4 | 5.5 | 2.89 | ± | 2.04 |
| 27/4/6-01B | 650 | 0.0661 | 5.0250 | 3.9199 | 0.0970 | 6.72E-19 | 0.5 | 7.2 | 0.15 | ± | 3.68 |
| 27/4/6-01C | 699 | 0.0496 | 4.5109 | 2.7084 | 1.2119 | 1.98E-18 | 7.9 | 12.4 | 1.91 | ± | 0.75 |
| 27/4/6-01D | 725 | 0.0455 | 3.3772 | 1.6624 | 1.0603 | 7.23E-18 | 7.5 | 31.4 | 1.67 | ± | 0.30 |
| 27/4/6-01E | 750 | 0.0404 | 2.6978 | 0.7911 | 0.5508 | 2.40E-18 | 4.5 | 37.7 | 0.87 | ± | 0.98 |
| 27/4/6-01F | 775 | 0.0500 | 2.7603 | 0.6221 | 1.3299 | 1.39E-18 | 8.4 | 41.3 | 2.09 | ± | 1.70 |
| 27/4/6-01G | 810 | 0.1478 | 3.1664 | 0.4093 | 1.3221 | 3.92E-18 | 3.0 | 51.6 | 2.08 | ± | 0.73 |
| 27/4/6-01H | 850 | 0.1742 | 3.9856 | 0.2564 | 2.0726 | 4.05E-18 | 3.9 | 62.2 | 3.26 | ± | 0.82 |
| 27/4/6-01I | 890 | 0.1015 | 5.1970 | 0.1344 | 1.3115 | 3.00E-18 | 4.2 | 70.1 | 2.06 | ± | 0.82 |
| 27/4/6-01J | 930 | 0.0811 | 6.0809 | 0.0913 | 0.9728 | 1.85E-18 | 4.0 | 74.9 | 1.53 | ± | 1.26 |
| 27/4/6-01K | 980 | 0.0979 | 5.0661 | 0.0744 | 6.0982 | 1.32E-18 | 17.6 | 78.4 | 9.57 | ± | 1.80 |
| 27/4/6-01L | 1050 | 0.0521 | 2.9169 | 0.0498 | 22.7609 | 1.59E-18 | 60.0 | 82.5 | 35.47 | ± | 1.47 |
| 27/4/6-01M | 1150 | 0.0549 | 3.9106 | 0.0536 | 23.7021 | 2.75E-18 | 59.8 | 89.8 | 36.92 | ± | 0.92 |
| 27/4/6-01N | 1250 | 0.1589 | 105.5363 | 0.1953 | 40.2477 | 1.89E-18 | 49.2 | 94.7 | 62.26 | ± | 1.82 |
| 27/4/6-01O | 359 | 0.1370 | 83.3446 | 0.5321 | 28.9769 | 2.02E-18 | 44.7 | 100.0 | 45.04 | ± | 3.96 |
| **X28326** | **groundmass** |  |  |  |  |  |  |  |  |  |  |
| Discrimination | 0.99595 |  | J Factor | 0.001102 |  |  |  |  |  |  |  |
| (39Ar/37Ar)Ca | 0.00067 |  | Weight (mg) | ?? |  |  |  |  |  |  |  |
| (36Ar/37Ar)Ca | 0.00027 |  | Sens. (mol/mv) | 3.43 x10-17 |  |  |  |  |  |  |  |
| (38Ar/39Ar)K | 0.01077 |  |  |  |  |  |  |  |  |  |  |
| (40Ar/39Ar)K | 0.04950 |  | Plateau Age | 0.90±0.05 | Ma |  |  |  |  |  |  |
| Run ID# | Temp. (°C) | 36Ar/39Ar | 37Ar/39Ar | 38Ar/39Ar | 40Ar*/39Ar | Moles 39Ar | %40Ar* | Cum. %39Ar | Age (Ma) | ± | 1 s.d. |
| 29/1/17-01A | 600 | 0.000433 | 10.1001 | 7.0006 | 1.5545 | 3.60E-18 | 9.8 | 0.9 | 2.44 | ± | 3.05 |
| 29/1/17-01B | 700 | 0.000007 | 4.2659 | 6.2584 | 0.0290 | 1.60E-17 | 7.5 | 4.9 | 0.05 | ± | 0.33 |
| 29/1/17-01C | 775 | 0.000257 | 5.6258 | 2.6488 | 0.8385 | 1.00E-17 | 11.2 | 7.4 | 1.31 | ± | 0.22 |
| 29/1/17-01D | 825 | 0.000311 | 6.2584 | 2.0058 | 0.9449 | 2.68E-17 | 14.3 | 14.1 | 1.48 | ± | 0.39 |
| 29/1/17-01E | 900 | 0.000378 | 7.8965 | 1.9846 | 0.5902 | 3.80E-17 | 25.6 | 23.6 | 0.92 | ± | 0.10 |
| 29/1/17-01F | 950 | 0.000338 | 9.0003 | 1.6542 | 0.6837 | 6.38E-17 | 20.6 | 39.5 | 1.07 | ± | 0.08 |
| 29/1/17-01G | 1000 | 0.000217 | 11.2490 | 1.2259 | 0.5579 | 6.42E-17 | 18.2 | 55.6 | 0.87 | ± | 0.05 |
| 29/1/17-01H | 1050 | 0.000284 | 16.5484 | 1.0255 | 0.6224 | 5.52E-17 | 20.3 | 69.4 | 0.98 | ± | 0.08 |
| 29/1/17-01I | 1100 | 0.000271 | 14.1585 | 0.8420 | 0.5063 | 3.84E-17 | 25.9 | 79.0 | 0.79 | ± | 0.08 |
| 29/1/17-01J | 1200 | 0.000351 | 16.3219 | 0.9485 | 0.5321 | 2.92E-17 | 33.1 | 86.3 | 0.83 | ± | 0.12 |
| 29/1/17-01K | 14550 | 0.000230 | 2.6594 | 1.2580 | 0.3709 | 5.48E-17 | 30.8 | 100.00 | 0.58 | ± | 0.27 |
| **X28348** | **groundmass** |  |  |  |  |  |  |  |  |  |  |
| Discrimination | 0.99595 |  | J Factor | 0.000869 |  |  |  |  |  |  |  |
| (39Ar/37Ar)Ca | 0.00067 |  | Weight (mg) | 125.8 |  |  |  |  |  |  |  |
| (36Ar/37Ar)Ca | 0.00027 |  | Sens. (mol/mv) | 3.43 x10-17 |  |  |  |  |  |  |  |
| (38Ar/39Ar)K | 0.01077 |  |  |  |  |  |  |  |  |  |  |
| (40Ar/39Ar)K | 0.04950 |  | Plateau Age | 0.54±0.11 | Ma |  |  |  |  |  |  |
| Run ID# | Temp. (°C) | 36Ar/39Ar | 37Ar/39Ar | 38Ar/39Ar | 40Ar*/39Ar | Moles 39Ar | %40Ar* | Cum. %39Ar | Age (Ma) | ± | 1 s.d. |
| 27/2/10-02A | 700 | 0.000157 | 2.0012 | 8.8854 | 3.7894 | 3.92E-17 | 1.4 | 5.6 | 5.94 | ± | 1.58 |
| 27/2/10-02B | 800 | 0.000163 | 3.0015 | 5.6625 | 0.3386 | 3.18E-16 | 24.1 | 51.0 | 0.53 | ± | 0.15 |
| 27/2/10-02C | 1000 | 0.000173 | 5.6494 | 2.3694 | 0.3548 | 1.47E-16 | 23.2 | 72.0 | 0.56 | ± | 0.28 |
| 27/2/10-02D | 1100 | 0.000173 | 5.9488 | 2.1548 | 0.2999 | 1.19E-16 | 30.4 | 89.0 | 0.47 | ± | 0.37 |
| 27/2/10-02E | 1200 | 0.000063 | 6.6497 | 1.6597 | 0.3322 | 4.34E-17 | 6.1 | 95.2 | 0.52 | ± | 1.51 |
| 27/2/10-02F | 1400 | 0.000052 | 47.5495 | 1.2635 | 0.3386 | 3.36E-17 | 4.9 | 100.0 | 0.53 | ± | 0.84 |
| **X28367** | **groundmass** |  |  |  |  |  |  |  |  |  |  |
| Discrimination |  |  | J Factor | 0.000480 |  |  |  |  |  |  |  |
| (39Ar/37Ar)Ca |  |  | Weight (mg) | 124.8 |  |  |  |  |  |  |  |
| (36Ar/37Ar)Ca |  |  | Sens. (mol/mv) | 3.43 x10-17 |  |  |  |  |  |  |  |
| (38Ar/39Ar)K |  |  |  |  |  |  |  |  |  |  |  |
| (40Ar/39Ar)K |  |  | Plateau Age | 0.35±0.03 | Ma |  |  |  |  |  |  |
| Run ID# | Temp. (°C) | 36Ar/39Ar | 37Ar/39Ar | 38Ar/39Ar | 40Ar*/39Ar | Moles 39Ar | %40Ar* | Cum. %39Ar | Age (Ma) | ± | 1 s.d. |
| 27/3/6-01B | 625 | 0.0444 | 0.0000 | 11.2426 | 52.0789 | 3.23E-20 | 80.8 | 0.1 | 45.95 | ± | 10.19 |
| 27/3/6-01C | 700 | 0.0074 | 2.4258 | 5.2742 | 0.3886 | 1.09E-17 | 19.4 | 19.1 | 0.35 | ± | 0.04 |
| 27/3/6-01D | 760 | 0.0059 | 1.0346 | 1.4763 | 0.5420 | 5.51E-18 | 26.5 | 28.8 | 0.48 | ± | 0.07 |
| 27/3/6-01E | 800 | 0.0015 | 1.2758 | 0.6873 | 0.3625 | 1.24E-17 | 55.7 | 50.6 | 0.32 | ± | 0.03 |
| 27/3/6-01F | 840 | 0.0015 | 1.9385 | 0.2985 | 0.4573 | 8.47E-18 | 64.1 | 65.5 | 0.41 | ± | 0.04 |
| 27/3/6-01G | 880 | 0.0020 | 2.8721 | 0.1328 | 0.5317 | 5.02E-18 | 60.5 | 74.3 | 0.48 | ± | 0.07 |
| 27/3/6-01H | 920 | 0.0033 | 3.7604 | 0.0746 | 0.8084 | 2.90E-18 | 55.0 | 79.4 | 0.72 | ± | 0.13 |
| 27/3/6-01I | 970 | 0.0027 | 3.2656 | 0.0568 | 1.2432 | 1.82E-18 | 69.8 | 82.6 | 1.11 | ± | 0.18 |
| 27/3/6-01J | 1050 | 0.0042 | 3.0715 | 0.0565 | 0.6279 | 3.33E-18 | 39.7 | 88.4 | 0.56 | ± | 0.10 |
| 27/3/6-01K | 1150 | 0.0087 | 10.5469 | 0.0865 | 1.1545 | 3.62E-18 | 40.8 | 94.8 | 1.03 | ± | 0.10 |
| 27/3/6-01L | 1250 | 0.0676 | 120.3485 | 0.3089 | 2.6573 | 2.96E-18 | 20.1 | 100.0 | 2.37 | ± | 0.21 |
| **UNI006** | **groundmass** |  |  |  |  |  |  |  |  |  |  |
| Discrimination | 0.99853 |  | J Factor | 0.002514 |  |  |  |  |  |  |  |
| (39Ar/37Ar)Ca | 0.00068 |  | Weight (mg) | 51.2 |  |  |  |  |  |  |  |
| (36Ar/37Ar)Ca | 0.00032 |  | Sens. (mol/mv) | 4.4 x10-17 |  |  |  |  |  |  |  |
| (38Ar/39Ar)K | 0.01077 |  |  |  |  |  |  |  |  |  |  |
| (40Ar/39Ar)K | 0.04117 |  | Plateau Age | 3.84±0.04 | Ma |  |  |  |  |  |  |
| Run ID# | Temp. (°C) | 36Ar/39Ar | 37Ar/39Ar | 38Ar/39Ar | 40Ar*/39Ar | Moles 39Ar | %40Ar* | Cum. %39Ar | Age (Ma) | ± | 1 s.d. |
| 32/4/06-01A | 750 | 1.4430 | 6.1903 | 1.6091 | -5.1832 | 7.07E-20 | -1.2 | 0.1 | -23.92 | ± | 86.52 |
| 32/4/06-01B | 850 | 0.5849 | 6.2829 | 1.0509 | -4.3029 | 3.56E-19 | -2.6 | 0.4 | -19.83 | ± | 21.09 |
| 32/4/06-01C | 925 | 0.1949 | 6.5623 | 0.4785 | -0.8918 | 6.59E-19 | -1.6 | 1.0 | -4.09 | ± | 7.42 |
| 32/4/06-01D | 1000 | 0.0546 | 6.4767 | 0.2450 | 0.1817 | 2.94E-18 | 1.2 | 3.7 | 0.83 | ± | 1.52 |
| 32/4/06-01E | 1040 | 0.0092 | 5.3343 | 0.0331 | 0.6470 | 6.22E-18 | 22.6 | 9.5 | 2.96 | ± | 0.50 |
| 32/4/06-01F | 1080 | 0.0101 | 7.0148 | 0.0199 | 0.7429 | 9.30E-18 | 24.2 | 18.1 | 3.40 | ± | 0.43 |
| 32/4/06-01G | 1120 | 0.0090 | 5.0111 | 0.0170 | 0.7890 | 1.08E-17 | 26.5 | 28.1 | 3.61 | ± | 0.71 |
| 32/4/06-01H | 1159 | 0.0039 | 3.7625 | 0.0149 | 0.8810 | 1.30E-17 | 52.6 | 40.1 | 4.03 | ± | 0.39 |
| 32/4/06-01I | 1200 | 0.0045 | 3.4183 | 0.0169 | 0.7853 | 1.27E-17 | 43.8 | 51.8 | 3.60 | ± | 0.36 |
| 32/4/06-01J | 1259 | 0.0083 | 3.5981 | 0.0241 | 0.7457 | 1.76E-17 | 26.1 | 68.2 | 3.42 | ± | 0.26 |
| 32/4/06-01K | 1351 | 0.0220 | 12.6574 | 0.0620 | 0.7288 | 2.28E-17 | 12.0 | 89.3 | 3.34 | ± | 0.34 |
| 32/4/06-01L | 1550 | 0.2878 | 40.4179 | 0.1618 | 0.9216 | 1.15E-17 | 1.1 | 100.0 | 4.22 | ± | 2.80 |
| **UNI005** | **groundmass** |  |  |  |  |  |  |  |  |  |  |
| Discrimination | 0.99898 |  | J Factor | 0.002516 |  |  |  |  |  |  |  |
| (39Ar/37Ar)Ca | 0.00068 |  | Weight (mg) | 49.7 |  |  |  |  |  |  |  |
| (36Ar/37Ar)Ca | 0.00032 |  | Sens. (mol/mv) | 4.4 x10-17 |  |  |  |  |  |  |  |
| (38Ar/39Ar)K | 0.01077 |  |  |  |  |  |  |  |  |  |  |
| (40Ar/39Ar)K | 0.04117 |  | Plateau Age | 3.12±0.07 | Ma |  |  |  |  |  |  |
| Run ID# | Temp. (°C) | 36Ar/39Ar | 37Ar/39Ar | 38Ar/39Ar | 40Ar*/39Ar | Moles 39Ar | %40Ar* | Cum. %39Ar | Age (Ma) | ± | 1 s.d. |
| 32/4/08-01A | 700 | 0.3685 | 0.0000 | 0.2368 | -1.4377 | 2.28E-19 | -1.3 | 0.1 | -6.61 | ± | 10.05 |
| 32/4/08-01B | 800 | 0.2175 | 0.2994 | 0.8615 | -0.1893 | 4.59E-18 | -0.3 | 2.0 | -0.87 | ± | 1.67 |
| 32/4/08-01C | 875 | 0.1263 | 0.3318 | 0.6079 | -0.0314 | 8.86E-18 | -0.1 | 5.6 | -0.14 | ± | 0.85 |
| 32/4/08-01D | 950 | 0.0535 | 0.2783 | 0.5639 | 0.6608 | 2.29E-17 | 4.0 | 15.0 | 3.03 | ± | 0.38 |
| 32/4/08-01E | 1010 | 0.0221 | 0.7074 | 0.5313 | 0.7379 | 3.37E-17 | 10.3 | 28.9 | 3.38 | ± | 0.25 |
| 32/4/08-01F | 1070 | 0.0180 | 1.4889 | 0.5777 | 0.6673 | 3.89E-17 | 11.5 | 44.9 | 3.06 | ± | 0.22 |
| 32/4/08-01G | 1120 | 0.0167 | 2.9726 | 0.5704 | 0.6978 | 3.15E-17 | 13.2 | 57.8 | 3.20 | ± | 0.22 |
| 32/4/08-01H | 1160 | 0.0174 | 2.6959 | 0.6075 | 0.6916 | 2.13E-17 | 12.5 | 66.6 | 3.17 | ± | 0.26 |
| 32/4/08-01I | 1200 | 0.0187 | 1.8617 | 0.6550 | 0.6371 | 1.74E-17 | 10.7 | 73.8 | 2.92 | ± | 0.25 |
| 32/4/08-01J | 1251 | 0.1435 | 3.0699 | 0.6725 | 0.7376 | 3.78E-17 | 1.7 | 89.3 | 3.38 | ± | 0.77 |
| 32/4/08-01K | 1304 | 0.1058 | 5.8258 | 0.7334 | 0.6826 | 2.35E-18 | 2.2 | 90.3 | 3.13 | ± | 1.20 |
| 32/4/08-01L | 1350 | 0.0300 | 5.3461 | 0.7018 | 0.7066 | 1.26E-17 | 7.8 | 95.4 | 3.24 | ± | 0.35 |
| 32/4/08-01M | 1397 | 0.0619 | 7.7235 | 0.6869 | 0.6759 | 5.86E-18 | 3.7 | 97.9 | 3.10 | ± | 0.59 |
| 32/4/08-01N | 1449 | 0.2607 | 17.2622 | 0.7015 | -0.8495 | 2.49E-18 | -1.1 | 98.9 | -3.90 | ± | 2.20 |
| 32/4/08-01O | 1550 | 0.4084 | 14.1303 | 0.6414 | -0.3790 | 2.72E-18 | -0.3 | 100.0 | -1.74 | ± | 3.16 |
| **UNI021** | **groundmass** |  |  |  |  |  |  |  |  |  |  |
| Discrimination | 0.99922 |  | J Factor | 0.00265 |  |  |  |  |  |  |  |
| (39Ar/37Ar)Ca | 0.0006823 |  | Weight (mg) | 51.7 |  |  |  |  |  |  |  |
| (36Ar/37Ar)Ca | 0.0003203 |  | Sens. (mol/mv) | 4.4 x10-17 |  |  |  |  |  |  |  |
| (38Ar/39Ar)K | 0.01077 |  |  |  |  |  |  |  |  |  |  |
| (40Ar/39Ar)K | 0.04117 |  | Plateau Age | 6.6±0.1 | Ma |  |  |  |  |  |  |
| Run ID# | Temp. (°C) | 36Ar/39Ar | 37Ar/39Ar | 38Ar/39Ar | 40Ar*/39Ar | Moles 39Ar | %40Ar* | Cum. %39Ar | Age (Ma) | ± | 1 s.d. |
| 32/5/16-01A | 750 | 7.1167 | 2.8418 | 2.8477 | -1.2203 | 2.17E-19 | -0.1 | 0.1 | -5.91 | ± | 310.07 |
| 32/5/16-01B | 850 | 2.9559 | 3.0567 | 0.9593 | -14.5195 | 2.90E-19 | -1.7 | 0.2 | -71.55 | ± | 99.60 |
| 32/5/16-01C | 950 | 0.5254 | 3.7490 | 0.4429 | 1.3791 | 9.65E-19 | 0.9 | 0.7 | 6.65 | ± | 9.61 |
| 32/5/16-01D | 1025 | 0.2265 | 4.9577 | 0.3703 | 3.0470 | 3.96E-18 | 4.4 | 2.5 | 14.66 | ± | 2.31 |
| 32/5/16-01E | 1060 | 0.1524 | 4.0211 | 0.2659 | 2.3449 | 1.15E-17 | 5 | 7.7 | 11.30 | ± | 1.21 |
| 32/5/16-01F | 1095 | 0.0756 | 1.8380 | 0.4041 | 1.3550 | 3.12E-17 | 5.8 | 21.9 | 6.54 | ± | 0.76 |
| 32/5/16-01G | 1130 | 0.0280 | 2.3028 | 0.1966 | 1.3444 | 3.56E-17 | 14.3 | 38.1 | 6.48 | ± | 0.43 |
| 32/5/16-01H | 1169 | 0.0071 | 2.9565 | 0.1083 | 1.4308 | 3.54E-17 | 44.1 | 54.2 | 6.90 | ± | 0.40 |
| 32/5/16-01I | 1218 | 0.0045 | 2.2327 | 0.1193 | 1.4077 | 3.30E-17 | 55.6 | 69.2 | 6.79 | ± | 0.40 |
| 32/5/16-01J | 1273 | 0.0040 | 1.7793 | 0.1358 | 1.3320 | 2.37E-17 | 56.7 | 80.0 | 6.43 | ± | 0.38 |
| 32/5/16-01K | 1350 | 0.0107 | 6.2111 | 0.2568 | 1.3529 | 1.49E-17 | 34.5 | 86.8 | 6.53 | ± | 0.41 |
| 32/5/16-01L | 1550 | 0.0505 | 17.8416 | 0.2325 | 1.4112 | 2.90E-17 | 9.5 | 100.0 | 6.81 | ± | 0.50 |
| **UNI023** | **groundmass** |  |  |  |  |  |  |  |  |  |  |
| Discrimination | 0.99853 |  | J Factor | 0.00265 |  |  |  |  |  |  |  |
| (39Ar/37Ar)Ca | 0.00068 |  | Weight (mg) | 50.1 |  |  |  |  |  |  |  |
| (36Ar/37Ar)Ca | 0.00032 |  | Sens. (mol/mv) | 4.4 x10-17 |  |  |  |  |  |  |  |
| (38Ar/39Ar)K | 0.01077 |  |  |  |  |  |  |  |  |  |  |
| (40Ar/39Ar)K | 0.04117 |  | Plateau Age | 5.02±0.15 | Ma |  |  |  |  |  |  |
| Run ID# | Temp. (°C) | 36Ar/39Ar | 37Ar/39Ar | 38Ar/39Ar | 40Ar*/39Ar | Moles 39Ar | %40Ar* | Cum. %39Ar | Age (Ma) | ± | 1 s.d. |
| 32/5/12-01A | 700 | 2.6733 | 1.6522 | 0.2230 | 2.6546 | 4.52E-20 | 0.3 | 0.0 | 12.78 | ± | 349.95 |
| 32/5/12-01B | 800 | 1.6003 | 1.1905 | 0.2759 | -6.5195 | 1.65E-19 | -1.4 | 0.1 | -31.78 | ± | 77.34 |
| 32/5/12-01C | 875 | 0.7291 | 0.8425 | 0.1964 | -8.7691 | 3.64E-19 | -4.2 | 0.3 | -42.87 | ± | 24.02 |
| 32/5/12-01D | 950 | 0.6638 | 1.3430 | 0.1368 | -0.5525 | 1.21E-18 | -0.3 | 0.9 | -2.67 | ± | 18.01 |
| 32/5/12-01E | 1000 | 0.0331 | 1.4049 | 0.0186 | 1.1867 | 3.12E-18 | 10.9 | 2.6 | 5.73 | ± | 1.41 |
| 32/5/12-01F | 1050 | 0.0029 | 1.6693 | 0.0094 | 1.1339 | 1.78E-17 | 62.1 | 11.9 | 5.47 | ± | 0.35 |
| 32/5/12-01G | 1100 | 0.0011 | 1.3986 | 0.0069 | 1.0055 | 4.92E-17 | 83.3 | 37.7 | 4.85 | ± | 0.28 |
| 32/5/12-01H | 1150 | 0.0007 | 1.5473 | 0.0075 | 1.1001 | 6.28E-17 | 95.5 | 70.6 | 5.31 | ± | 0.31 |
| 32/5/12-01I | 1201 | 0.0012 | 2.0428 | 0.0094 | 1.2725 | 3.41E-17 | 88.0 | 88.5 | 6.14 | ± | 0.36 |
| 32/5/12-01J | 1251 | 0.0051 | 4.1641 | 0.0557 | 2.8012 | 9.86E-18 | 71.5 | 93.6 | 13.49 | ± | 0.85 |
| 32/5/12-01K | 1299 | 0.0178 | 5.8490 | 0.2455 | 7.3645 | 4.17E-18 | 61.0 | 95.8 | 35.24 | ± | 2.41 |
| 32/5/12-01L | 1349 | 0.0587 | 14.5946 | 0.4792 | -0.0047 | 3.21E-18 | 0.0 | 97.5 | -0.02 | ± | 1.51 |
| 32/5/12-01M | 1403 | 0.0940 | 35.7296 | 0.7314 | -0.3543 | 1.40E-18 | -1.4 | 98.2 | -1.71 | ± | 3.39 |
| 32/5/12-01N | 1550 | 0.1114 | 23.8633 | 0.3074 | 0.4285 | 3.37E-18 | 1.4 | 100.0 | 2.07 | ± | 4.52 |
| **UNI024** | **groundmass** |  |  |  |  |  |  |  |  |  |  |
| Discrimination | 0.99853 |  | J Factor | 0.002661 |  |  |  |  |  |  |  |
| (39Ar/37Ar)Ca | 0.00068 |  | Weight (mg) | 52.9 |  |  |  |  |  |  |  |
| (36Ar/37Ar)Ca | 0.00032 |  | Sens. (mol/mv) | 4.4 x10-17 |  |  |  |  |  |  |  |
| (38Ar/39Ar)K | 0.01077 |  |  |  |  |  |  |  |  |  |  |
| (40Ar/39Ar)K | 0.04117 |  | Plateau Age | 4.95±0.07 | Ma |  |  |  |  |  |  |
| Run ID# | Temp. (°C) | 36Ar/39Ar | 37Ar/39Ar | 38Ar/39Ar | 40Ar*/39Ar | Moles 39Ar | %40Ar* | Cum. %39Ar | Age (Ma) | ± | 1 s.d. |
| 32/5/8-01A | 600 | 1.5342 | 24.7968 | 2.8976 | -216.8571 | -2.72E-21 | -89.7 | 0.0 | -1569.1 | ± | 6212.0 |
| 32/5/8-01B | 700 | 0.8127 | 0.2335 | -0.0251 | -19.4599 | 6.26E-20 | -8.8 | 0.0 | -96.96 | ± | 148.28 |
| 32/5/8-01C | 760 | 0.6555 | 0.0000 | -0.0664 | 0.9598 | 3.96E-20 | 0.5 | 0.0 | 4.65 | ± | 159.97 |
| 32/5/8-01D | 820 | 0.4602 | 0.6086 | -0.0008 | -3.9760 | 1.44E-19 | -3.0 | 0.1 | -19.40 | ± | 46.60 |
| 32/5/8-01E | 880 | 0.3050 | 0.6661 | 0.0224 | -1.4277 | 4.04E-19 | -1.6 | 0.2 | -6.94 | ± | 15.58 |
| 32/5/8-01F | 940 | 0.3251 | 0.7535 | 0.0218 | 1.2079 | 1.02E-18 | 1.2 | 0.5 | 5.85 | ± | 11.10 |
| 32/5/8-01G | 1000 | 0.0357 | 0.5767 | 0.0033 | 0.8322 | 6.02E-18 | 7.4 | 2.5 | 4.03 | ± | 1.08 |
| 32/5/8-01H | 1060 | 0.0018 | 0.4944 | 0.0003 | 0.9918 | 5.67E-17 | 67.5 | 20.9 | 4.81 | ± | 0.30 |
| 32/5/8-01I | 1101 | 0.0005 | 0.6204 | 0.0002 | 1.0313 | 7.93E-17 | 90.8 | 46.7 | 5.00 | ± | 0.29 |
| 32/5/8-01J | 1300 | 0.0010 | 1.1778 | 0.0002 | 1.0544 | 1.51E-16 | 85.1 | 95.7 | 5.11 | ± | 0.30 |
| 32/5/8-01K | 1352 | 0.0028 | 3.1108 | 0.0010 | 0.9013 | 9.10E-18 | 63.3 | 98.7 | 4.37 | ± | 0.83 |
| 32/5/8-01L | 1399 | 0.0101 | 8.1982 | 0.0056 | 0.7430 | 1.69E-18 | 25.0 | 99.2 | 3.60 | ± | 2.99 |
| 32/5/8-01O | 1550 | 0.0813 | 21.3968 | 0.0035 | 0.4621 | 2.40E-18 | 2.0 | 100.0 | 2.24 | ± | 3.69 |
| **UNI027** | **groundmass** |  |  |  |  |  |  |  |  |  |  |
| Discrimination | 0.99898 |  | J Factor | 0.00253 |  |  |  |  |  |  |  |
| (39Ar/37Ar)Ca | 0.00068 |  | Weight (mg) | 50.7 |  |  |  |  |  |  |  |
| (36Ar/37Ar)Ca | 0.00032 |  | Sens. (mol/mv) | 4.4 x10-17 |  |  |  |  |  |  |  |
| (38Ar/39Ar)K | 0.01077 |  |  |  |  |  |  |  |  |  |  |
| (40Ar/39Ar)K | 0.04117 |  | Plateau Age | 3.75±0.04 | Ma |  |  |  |  |  |  |
| Run ID# | Temp. (°C) | 36Ar/39Ar | 37Ar/39Ar | 38Ar/39Ar | 40Ar*/39Ar | Moles 39Ar | %40Ar* | Cum. %39Ar | Age (Ma) | ± | 1 s.d. |
| 32/4/11-01A | 750 | 1.2285 | 0.9971 | 1.0484 | -7.3847 | 5.92E-20 | -2.1 | 0.0 | -34.39 | ± | 77.71 |
| 32/4/11-01B | 850 | 0.4901 | 1.0735 | 0.3467 | -3.2561 | 9.65E-19 | -2.3 | 0.3 | -15.08 | ± | 5.23 |
| 32/4/11-01C | 950 | 0.0529 | 0.7348 | 0.0366 | 0.3292 | 8.65E-18 | 2.1 | 3.1 | 1.52 | ± | 0.44 |
| 32/4/11-01D | 1025 | 0.0036 | 1.3123 | 0.0176 | 0.8102 | 3.16E-17 | 46.6 | 13.4 | 3.73 | ± | 0.23 |
| 32/4/11-01E | 1075 | 0.0023 | 1.3990 | 0.0136 | 0.8518 | 7.94E-17 | 60.5 | 39.2 | 3.93 | ± | 0.24 |
| 32/4/11-01F | 1120 | 0.0008 | 1.1229 | 0.0149 | 0.8227 | 9.62E-17 | 85.2 | 70.5 | 3.79 | ± | 0.23 |
| 32/4/11-01G | 1160 | 0.0010 | 1.5178 | 0.0234 | 0.8042 | 5.20E-17 | 85.4 | 87.4 | 3.71 | ± | 0.22 |
| 32/4/11-01H | 1200 | 0.0033 | 3.9885 | 0.0681 | 0.7571 | 1.69E-17 | 55.7 | 92.8 | 3.49 | ± | 0.23 |
| 32/4/11-01I | 1238 | 0.0087 | 5.8094 | 0.1952 | 0.8076 | 7.86E-18 | 28.7 | 95.4 | 3.72 | ± | 0.29 |
| 32/4/11-01J | 1282 | 0.0132 | 4.9471 | 0.3935 | 0.7601 | 5.86E-18 | 18.2 | 97.3 | 3.50 | ± | 0.36 |
| 32/4/11-01K | 1321 | 0.0284 | 5.7271 | 0.7698 | 0.5064 | 4.42E-18 | 6.1 | 98.7 | 2.33 | ± | 0.49 |
| 32/4/11-01L | 1359 | 0.1223 | 13.7261 | 1.8341 | -0.1709 | 1.46E-18 | -0.5 | 99.2 | -0.79 | ± | 1.58 |
| 32/4/11-01M | 1404 | 0.3293 | 26.1649 | 2.7539 | -0.2092 | 6.84E-19 | -0.2 | 99.4 | -0.97 | ± | 4.36 |
| 32/4/11-01N | 1500 | 0.4156 | 25.8150 | 1.1980 | -1.4615 | 1.29E-18 | -1.2 | 99.8 | -6.75 | ± | 3.71 |
| 32/4/11-01O | 1550 | 1.4954 | 50.2387 | 0.6029 | -7.7922 | 4.79E-19 | -1.8 | 100.0 | -36.31 | ± | 23.10 |
